# Supplementary material for: Structure and spectroscopic properties of etherates of the beryllium halides
Source: publisher site journal article supplement (doi:10.1515/znb-2023-0303), 2023-03-01
Supplement: Supplementary file 1 [file j_znb-2023-0303_suppl_001.pdf]

# **Supplementary Material**

## **Structure and spectroscopic properties of etherates of the beryllium halides**

Deniz F. Bekiş, Lewis R. Thomas-Hargreaves, Chantsalmaa Berthold, Sergei I. Ivlev and Magnus R. Buchner\*

### Table of Contents

|   |                                |     |
|---|--------------------------------|-----|
| 1 | NMR Spectroscopic Data         | S1  |
| 2 | Vibrational Spectroscopic Data | S37 |

# 1 NMR Spectroscopic Data

## 1.1 $[\text{BeCl}_2(\text{OEt}_2)_2]$ (**1a**):

### 1.1.1 Solvent – $\text{Et}_2\text{O}$

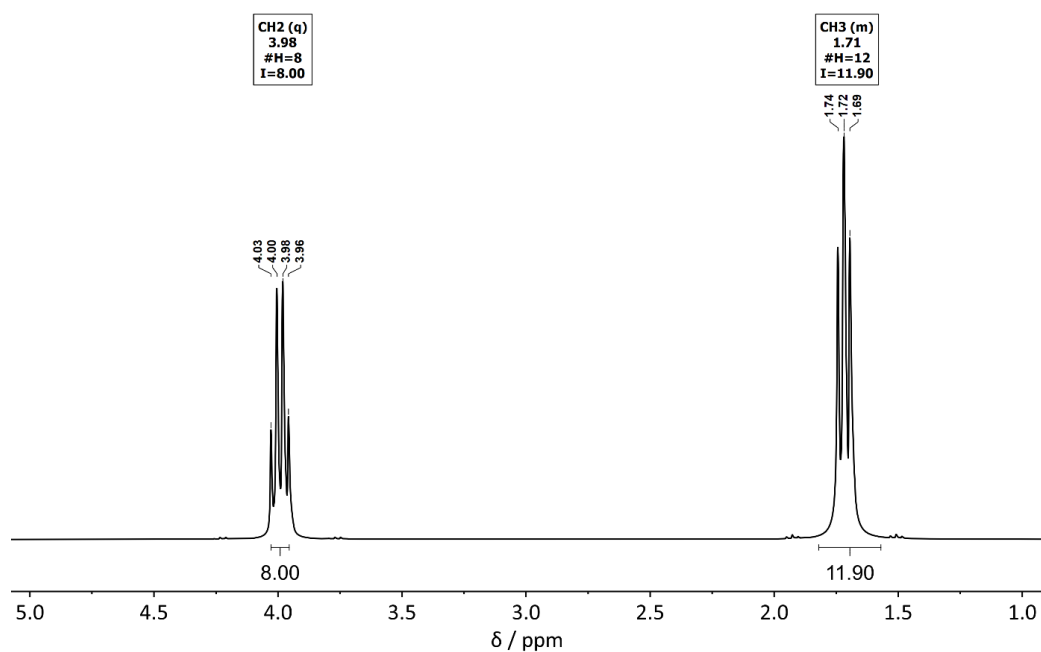

Figure 1:  $^1\text{H}$  NMR spectrum of  $[\text{BeCl}_2(\text{OEt}_2)_2]$  (**1a**) in  $\text{Et}_2\text{O}$  at  $T = 300$  K.

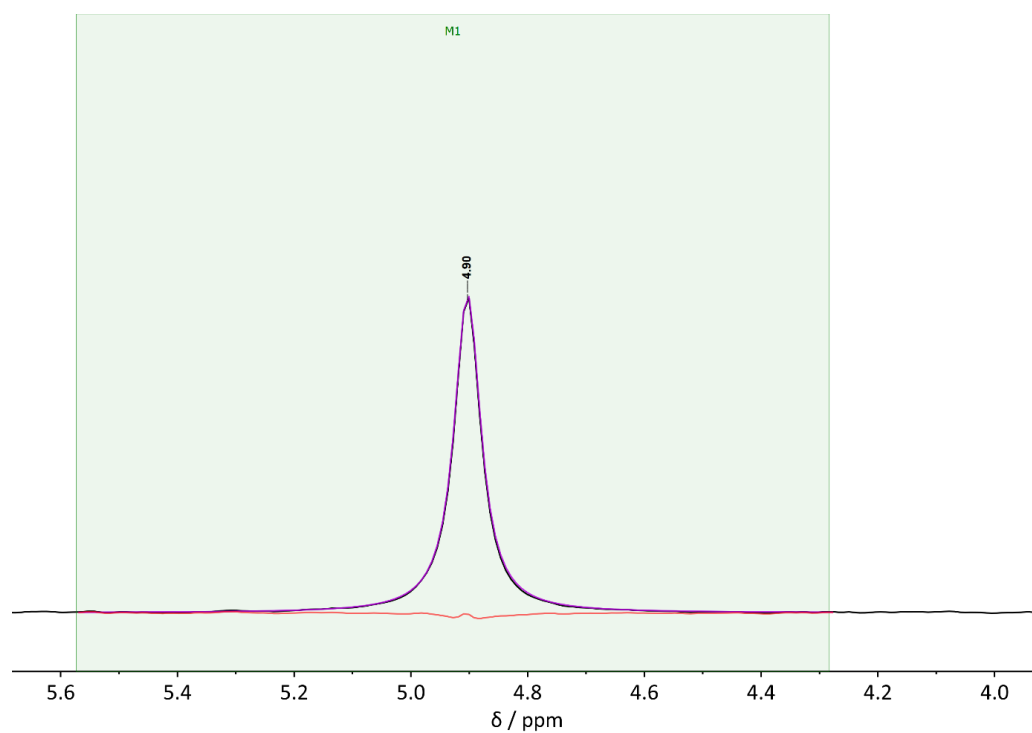

Figure 2:  $^9\text{Be}$  NMR spectrum of  $[\text{BeCl}_2(\text{OEt}_2)_2]$  (**1a**) in  $\text{Et}_2\text{O}$  at  $T = 300$  K. Line fitting profiles (purple) and differential plot of calculated *versus* observed line (red) profiles are marked.

### 1.1.2 Solvent – C<sub>6</sub>D<sub>6</sub>

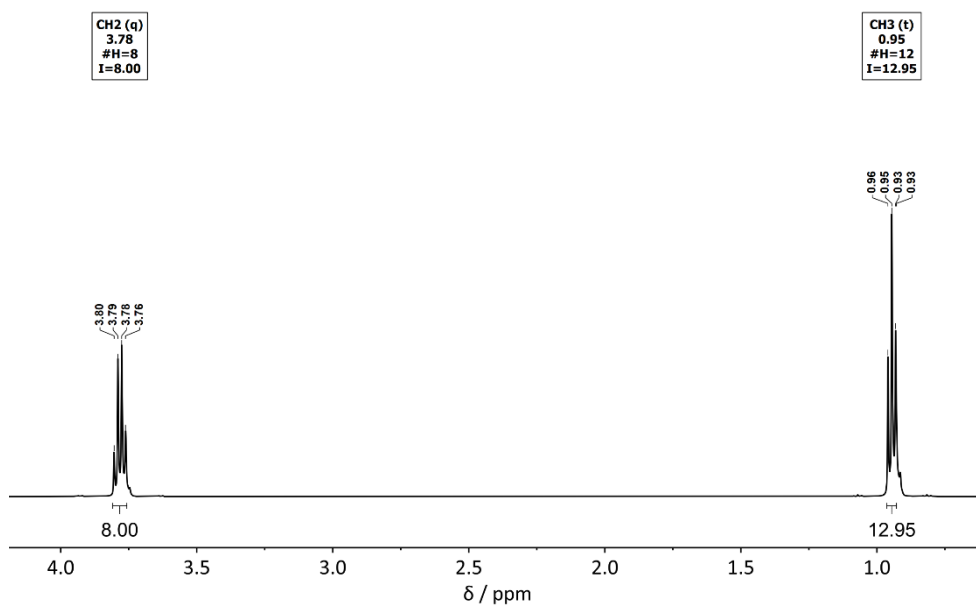

Figure 3: <sup>1</sup>H NMR spectrum of [BeCl<sub>2</sub>(OEt<sub>2</sub>)<sub>2</sub>] (**1a**) in C<sub>6</sub>D<sub>6</sub> at *T* = 300 K.

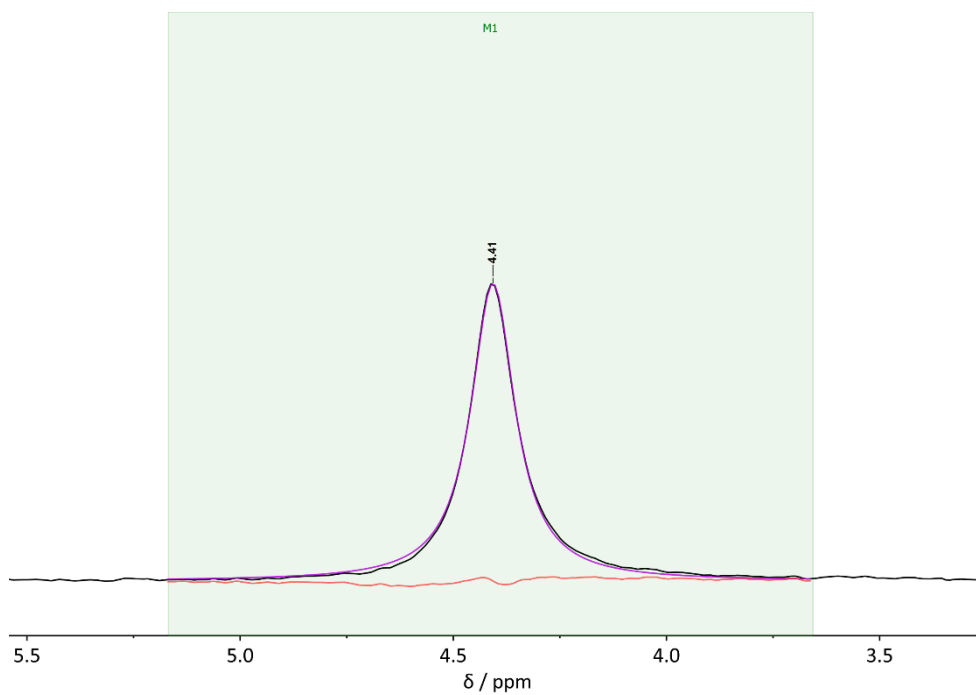

Figure 4: <sup>9</sup>Be NMR spectrum of [BeCl<sub>2</sub>(OEt<sub>2</sub>)<sub>2</sub>] (**1a**) in C<sub>6</sub>D<sub>6</sub> at *T* = 300 K. Line fitting profiles (purple) and differential plot of calculated *versus* observed line (red) profiles are marked.

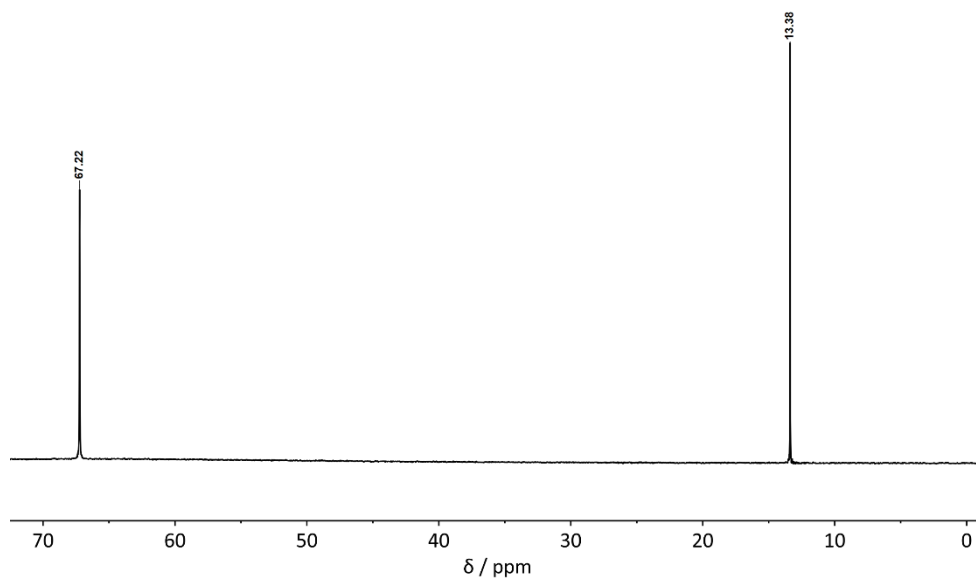

Figure 5:  $^{13}\text{C}\{^1\text{H}\}$  NMR spectrum of  $[\text{BeCl}_2(\text{OEt}_2)_2]$  (**1a**) in  $\text{C}_6\text{D}_6$  at  $T = 300\text{ K}$ .

### 1.1.3 Solvent – $\text{CD}_2\text{Cl}_2$

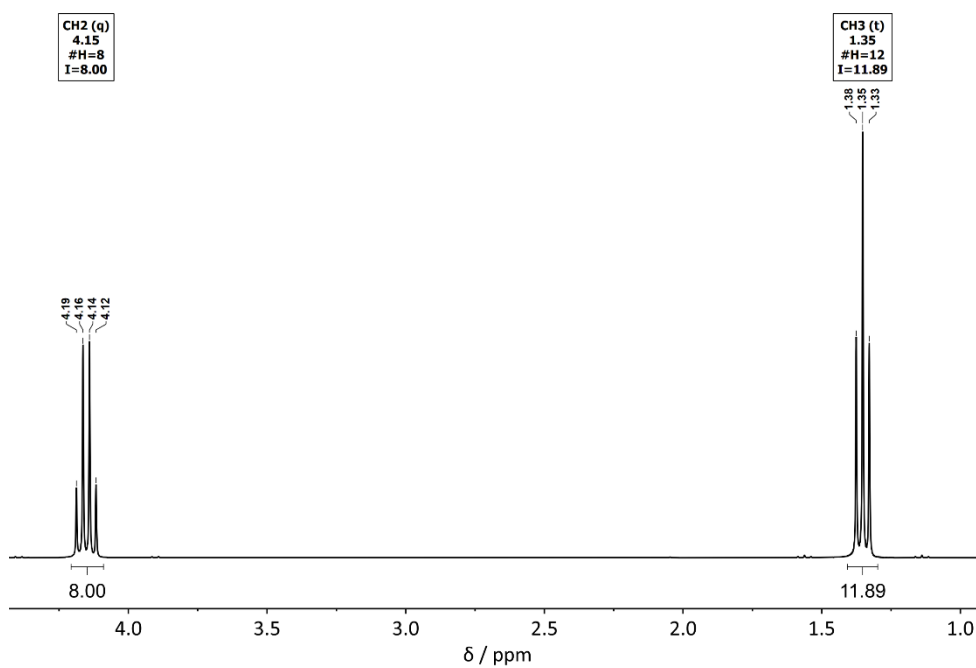

Figure 6:  $^1\text{H}$  NMR spectrum of  $[\text{BeCl}_2(\text{OEt}_2)_2]$  (**1a**) in  $\text{CD}_2\text{Cl}_2$  at  $T = 300\text{ K}$ .

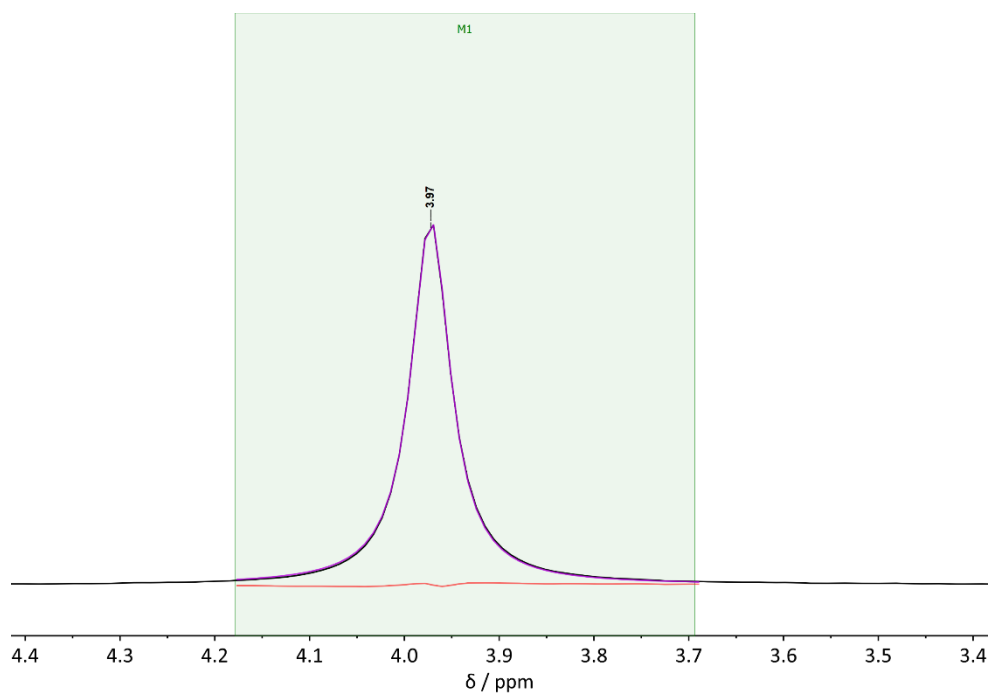

Figure 7:  $^9\text{Be}$  NMR spectrum of  $[\text{BeCl}_2(\text{OEt}_2)_2]$  (**1a**) in  $\text{CD}_2\text{Cl}_2$  at  $T = 300$  K. Line fitting profiles (purple) and differential plot of calculated *versus* observed line (red) profiles are marked.

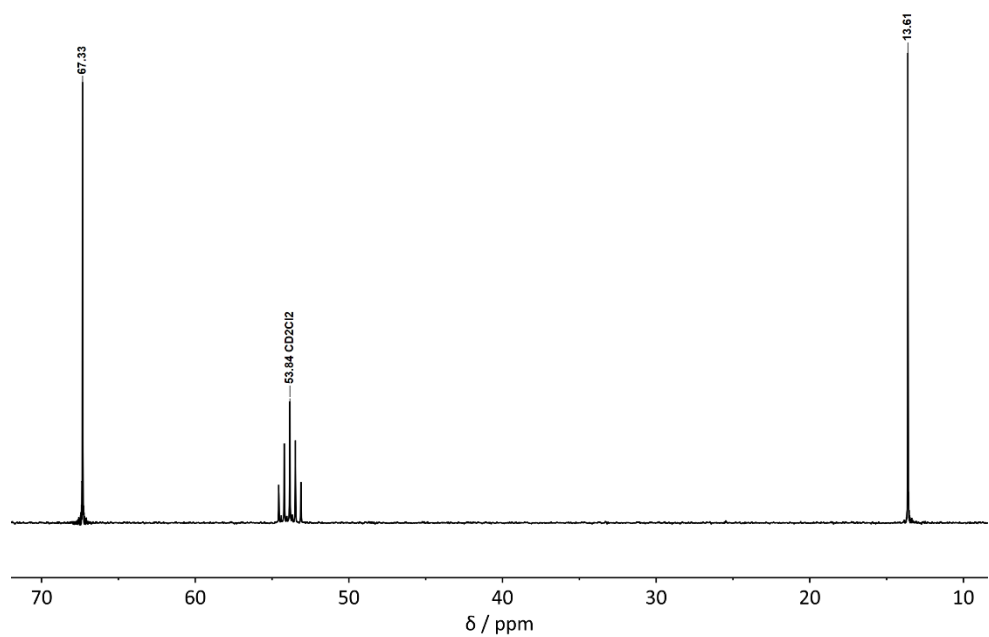

Figure 8:  $^{13}\text{C}\{^1\text{H}\}$  NMR spectrum of  $[\text{BeCl}_2(\text{OEt}_2)_2]$  (**1a**) in  $\text{CD}_2\text{Cl}_2$  at  $T = 300$  K.

### 1.1.4 Solvent – CDCl<sub>3</sub>

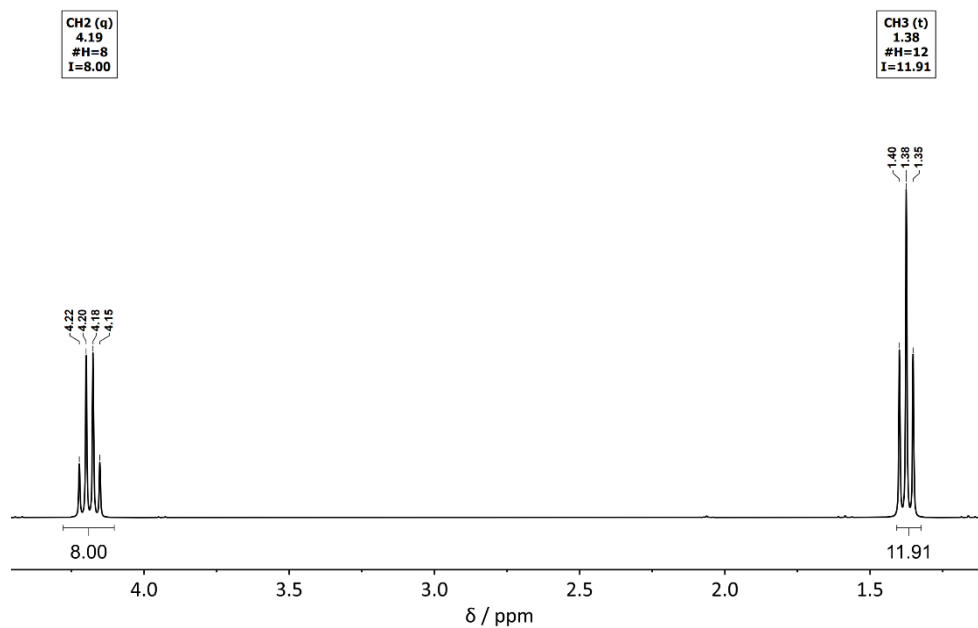

Figure 9: <sup>1</sup>H NMR spectrum of [BeCl<sub>2</sub>(OEt<sub>2</sub>)<sub>2</sub>] (**1a**) in CDCl<sub>3</sub> at *T* = 300 K.

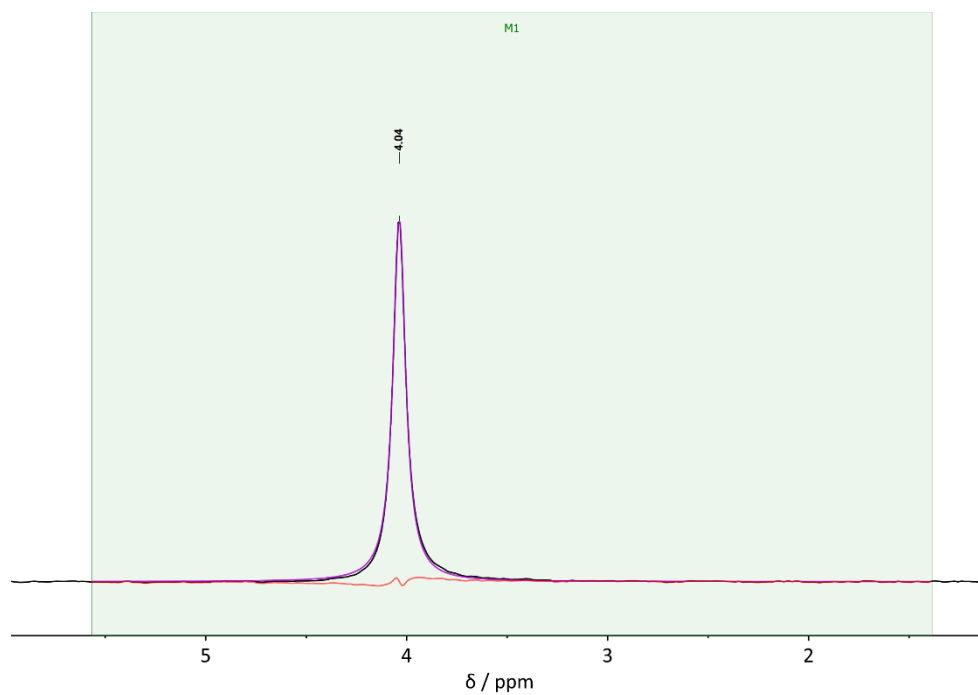

Figure 10: <sup>9</sup>Be NMR spectrum of [BeCl<sub>2</sub>(OEt<sub>2</sub>)<sub>2</sub>] (**1a**) in CDCl<sub>3</sub> at *T* = 300 K. Line fitting profiles (purple) and differential plot of calculated *versus* observed line (red) profiles are marked.

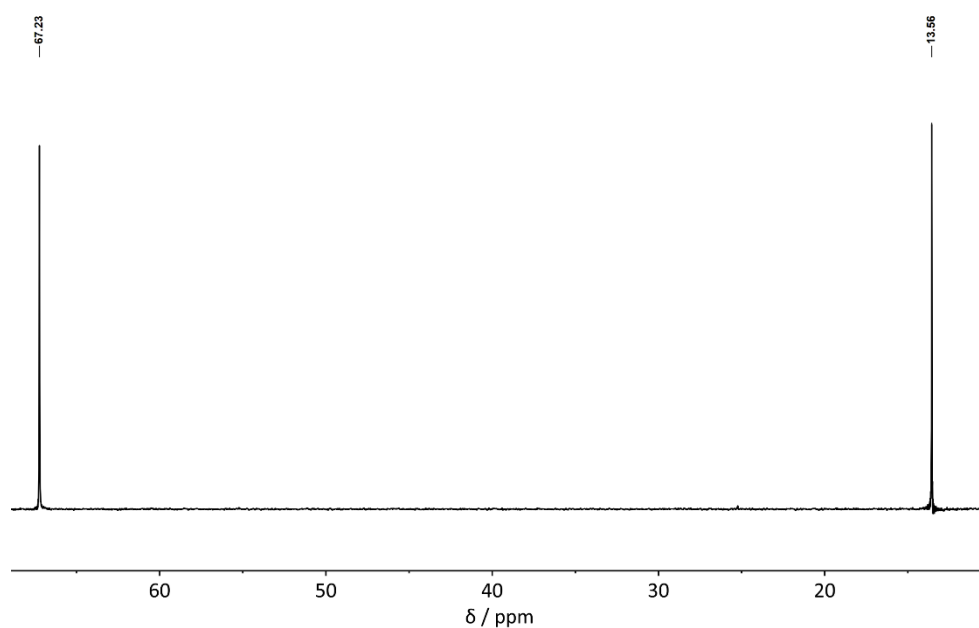

Figure 11:  $^{13}\text{C}\{^1\text{H}\}$  NMR spectrum of  $[\text{BeCl}_2(\text{OEt}_2)_2]$  (**1a**) in  $\text{CDCl}_3$  at  $T = 300\text{ K}$ .

## 1.2 $[\text{BeBr}_2(\text{OEt}_2)_2]$ (**1b**):

### 1.2.1 Solvent – $\text{Et}_2\text{O}$

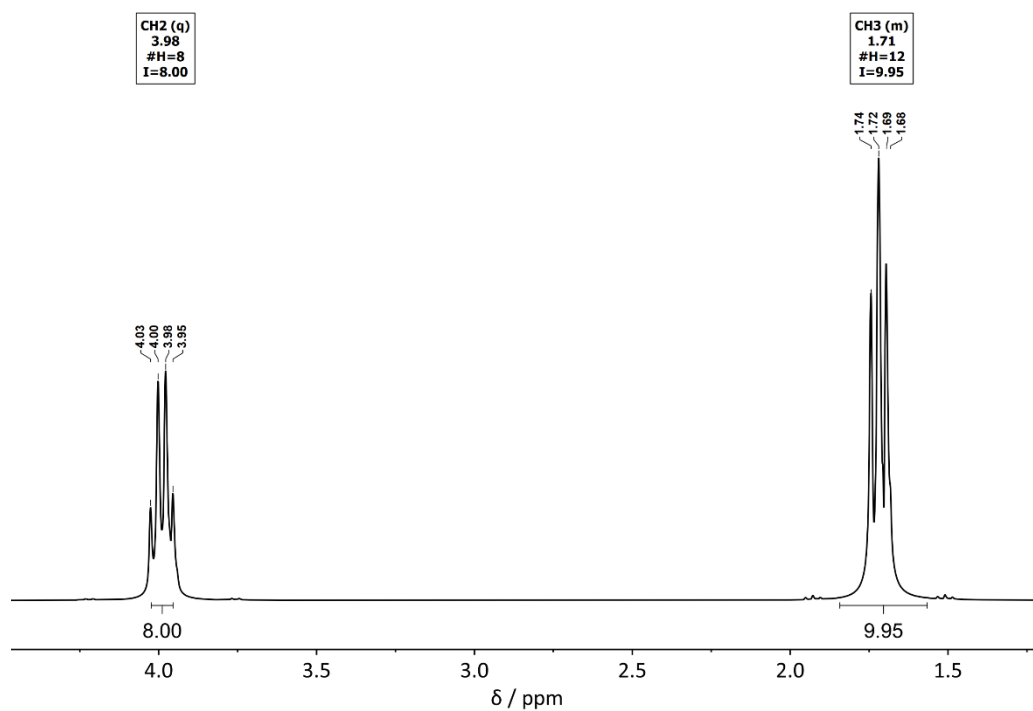

Figure 12:  $^1\text{H}$  NMR spectrum of  $[\text{BeBr}_2(\text{OEt}_2)_2]$  (**1b**) in  $\text{Et}_2\text{O}$  at  $T = 300\text{ K}$ .

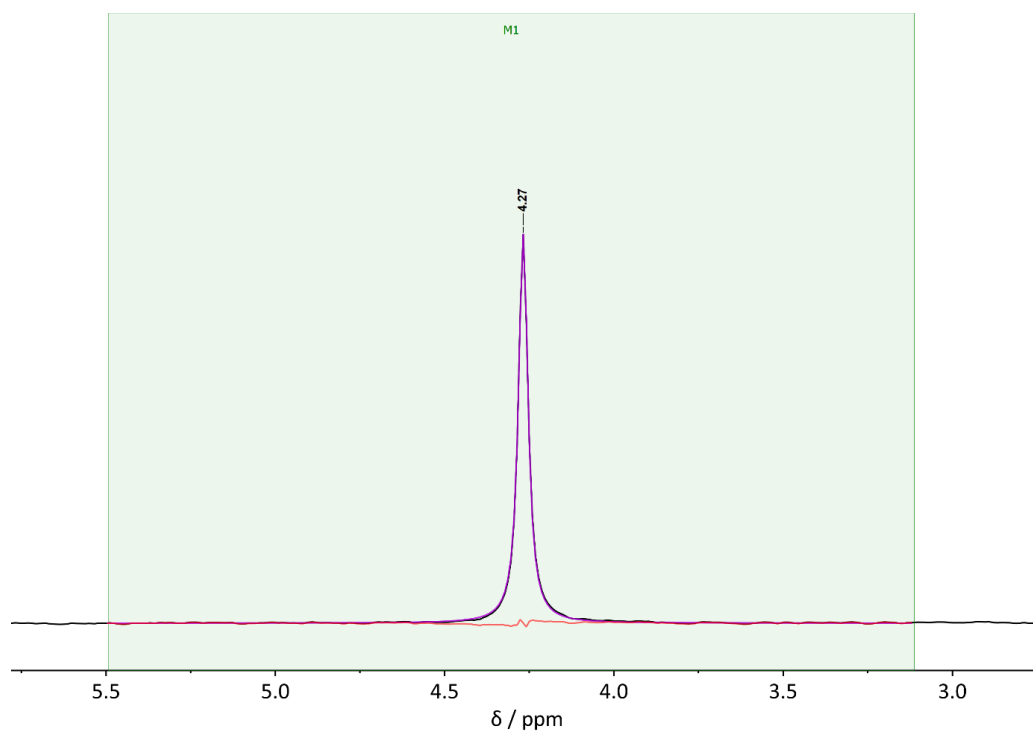

Figure 13:  $^9\text{Be}$  NMR spectrum of  $[\text{BeBr}_2(\text{OEt}_2)_2]$  (**1b**) in  $\text{Et}_2\text{O}$  at  $T = 300$  K. Line fitting profiles (purple) and differential plot of calculated *versus* observed line (red) profiles are marked.

### 1.2.2 Solvent – $\text{C}_6\text{D}_6$

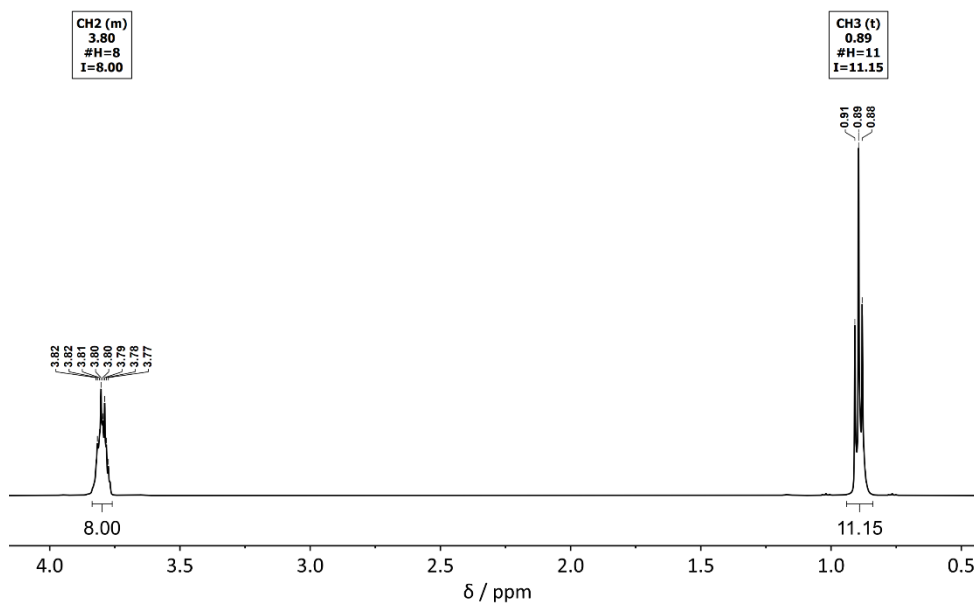

Figure 14:  $^1\text{H}$  NMR spectrum of  $[\text{BeBr}_2(\text{OEt}_2)_2]$  (**1b**) in  $\text{C}_6\text{D}_6$  at  $T = 300$  K.



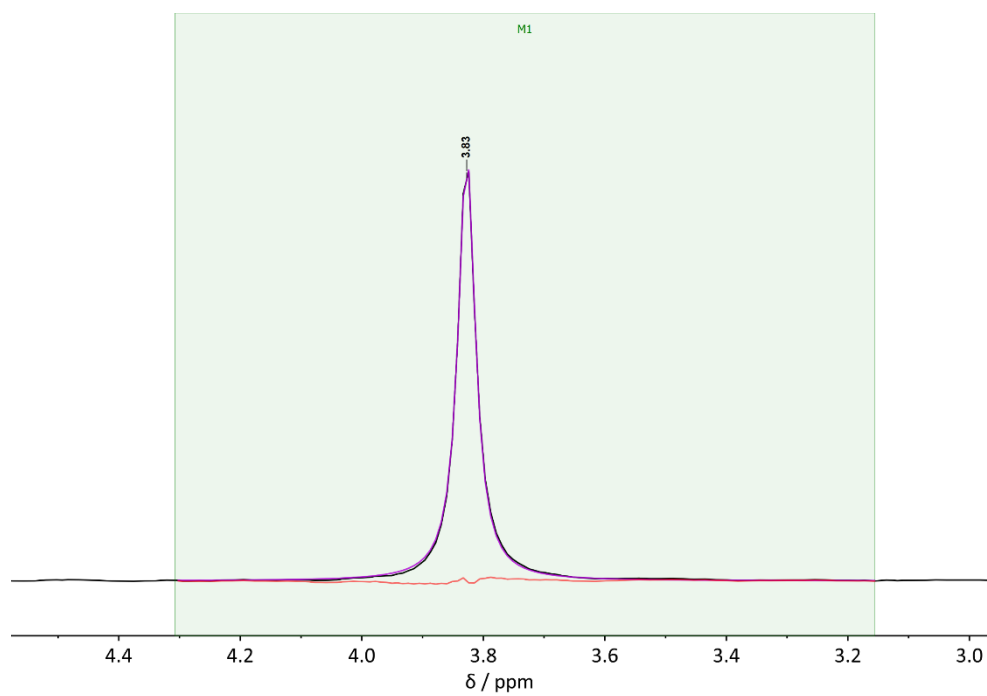

Figure 15:  $^9\text{Be}$  NMR spectrum of  $[\text{BeBr}_2(\text{OEt}_2)_2]$  (**1b**) in  $\text{C}_6\text{D}_6$  at  $T = 300$  K. Line fitting profiles (purple) and differential plot of calculated *versus* observed line (red) profiles are marked.

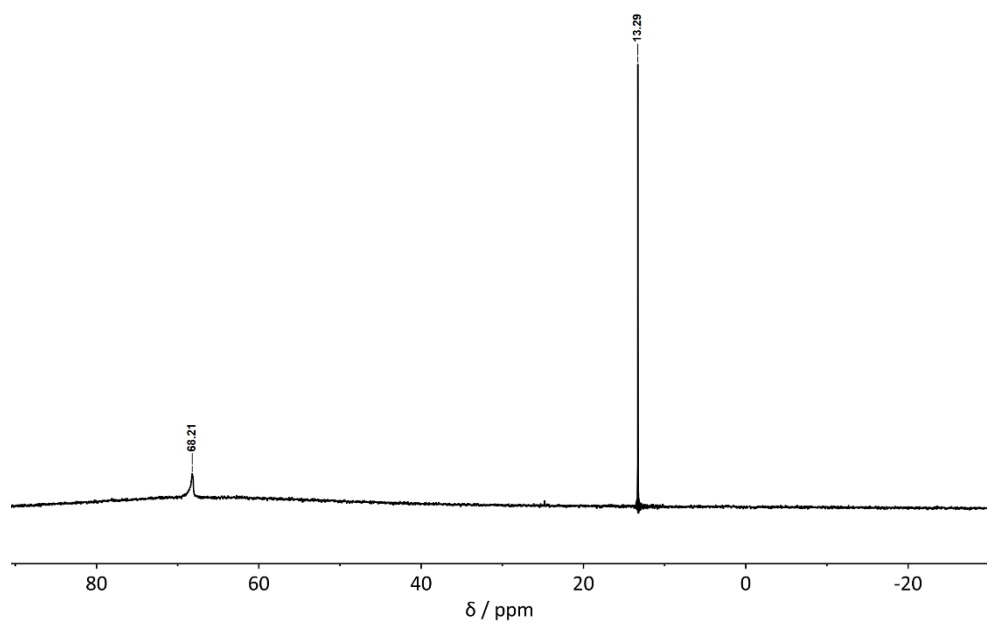

Figure 16:  $^{13}\text{C}\{^1\text{H}\}$  NMR spectrum of  $[\text{BeBr}_2(\text{OEt}_2)_2]$  (**1b**) in  $\text{C}_6\text{D}_6$  at  $T = 300$  K.

### 1.2.3 Solvent – CD<sub>2</sub>Cl<sub>2</sub>

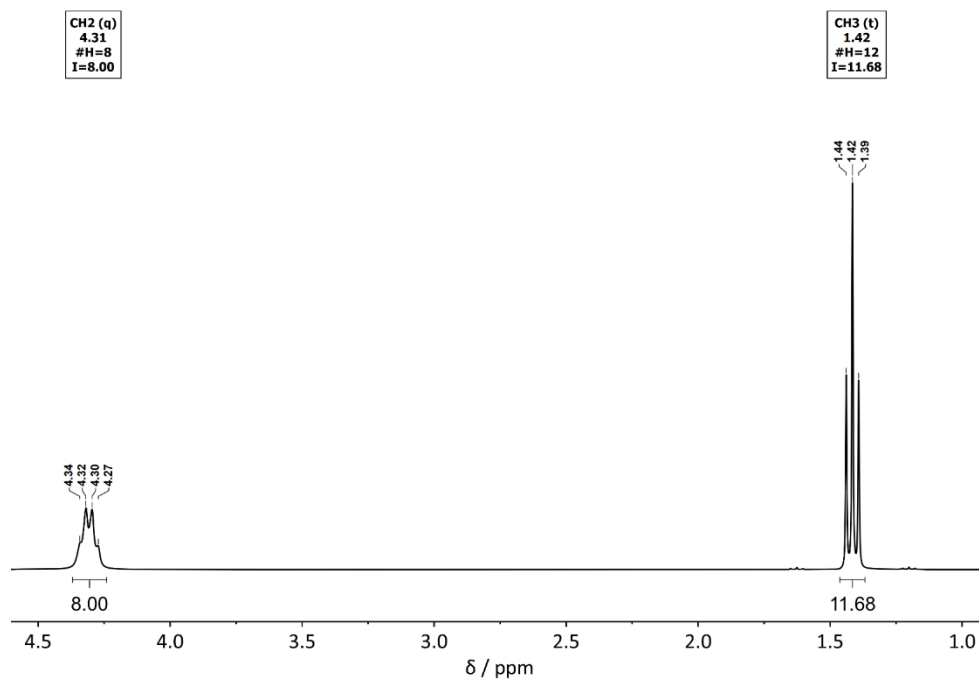

Figure 17: <sup>1</sup>H NMR spectrum of [BeBr<sub>2</sub>(OEt<sub>2</sub>)<sub>2</sub>] (**1b**) in CD<sub>2</sub>Cl<sub>2</sub> at *T* = 300 K.

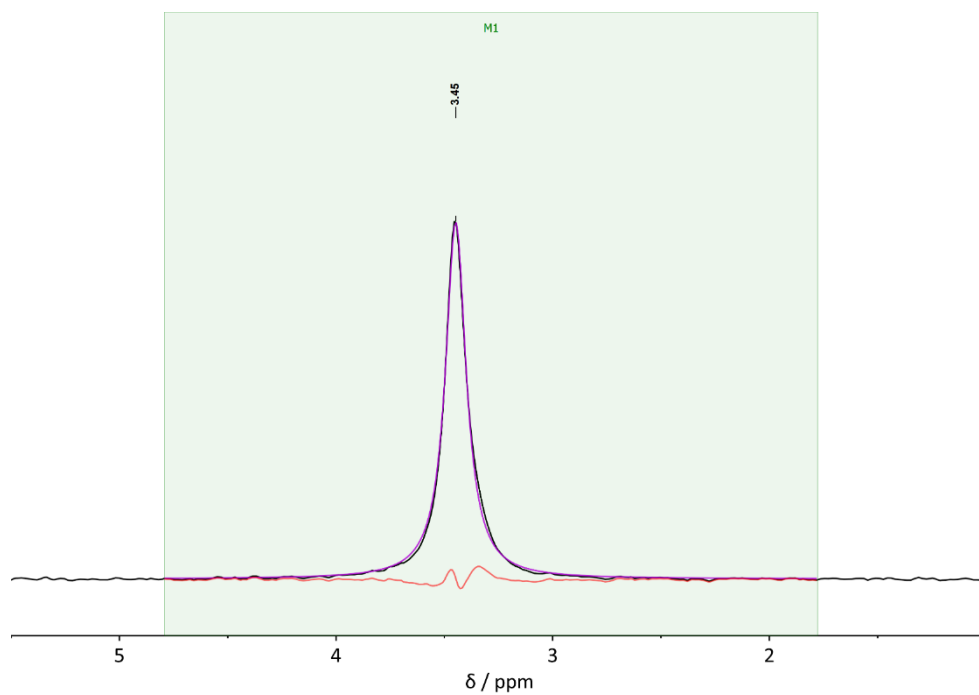

Figure 18: <sup>9</sup>Be NMR spectrum of [BeBr<sub>2</sub>(OEt<sub>2</sub>)<sub>2</sub>] (**1b**) in CD<sub>2</sub>Cl<sub>2</sub> at *T* = 300 K. Line fitting profiles (purple) and differential plot of calculated *versus* observed line (red) profiles are marked.

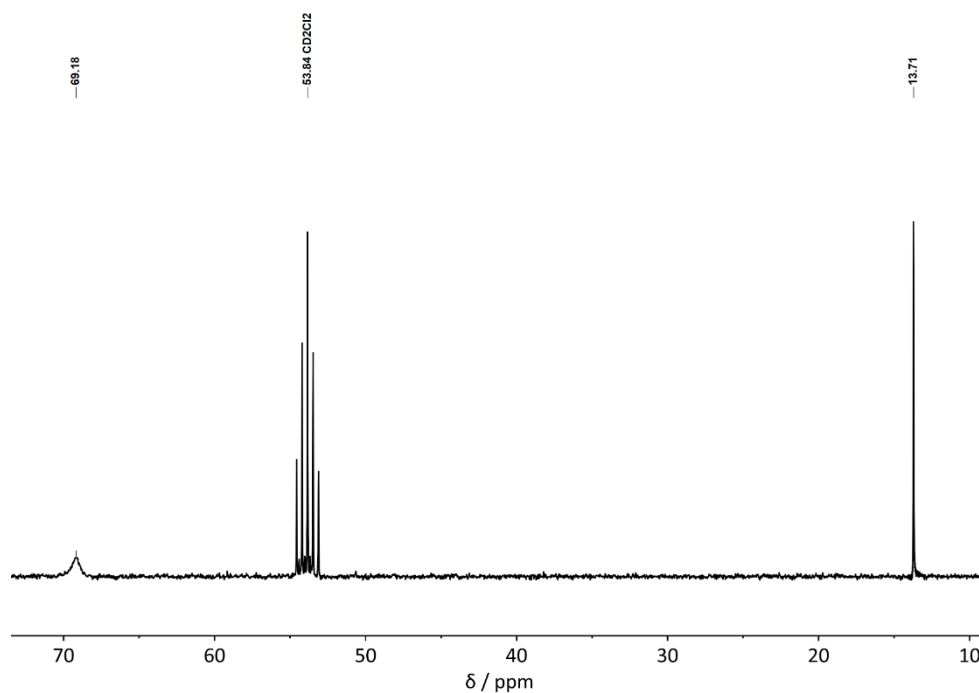

Figure 19:  $^{13}\text{C}\{^1\text{H}\}$  NMR spectrum of  $[\text{BeBr}_2(\text{OEt}_2)_2]$  (**1b**) in  $\text{CD}_2\text{Cl}_2$  at  $T = 300$  K.

#### 1.2.4 Solvent – $\text{CDCl}_3$

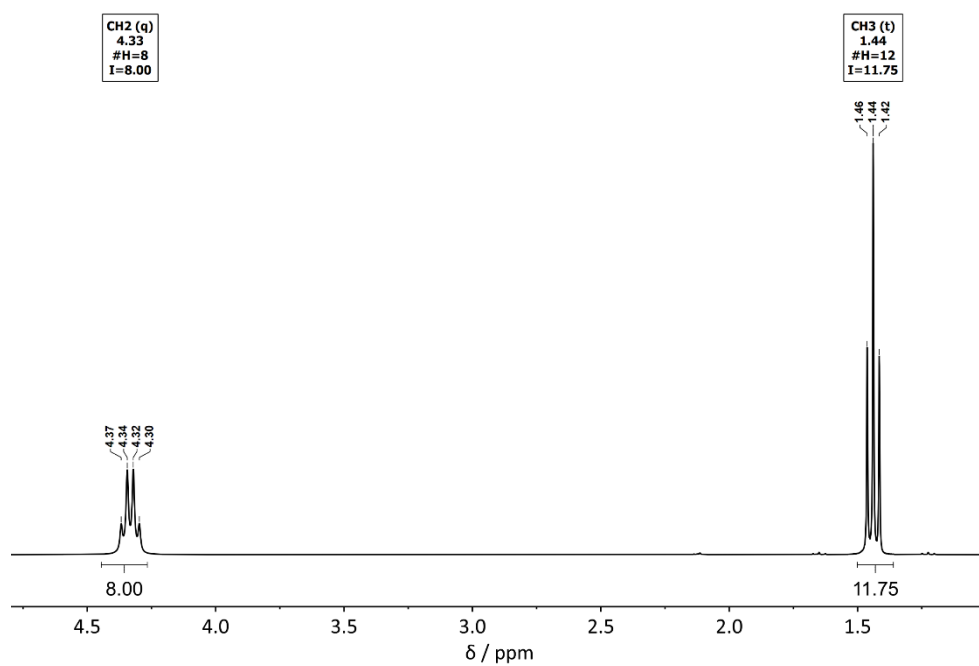

Figure 20:  $^1\text{H}$  NMR spectrum of  $[\text{BeBr}_2(\text{OEt}_2)_2]$  (**1b**) in  $\text{CDCl}_3$  at  $T = 300$  K.

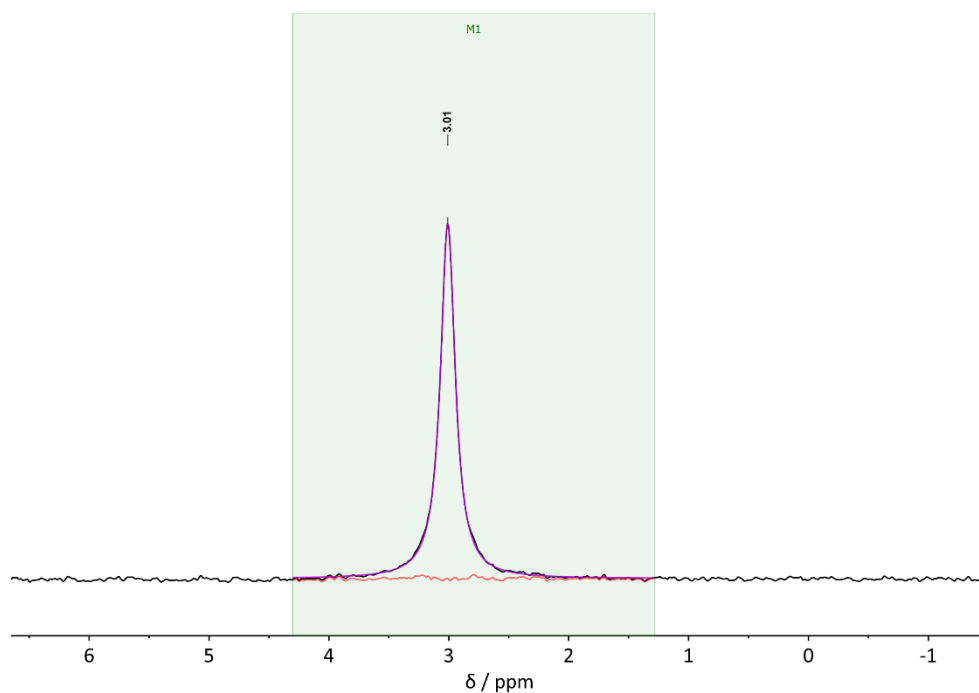

Figure 21:  $^9\text{Be}$  NMR spectrum of  $[\text{BeBr}_2(\text{OEt}_2)_2]$  (**1b**) in  $\text{CDCl}_3$  at  $T = 300$  K. Line fitting profiles (purple) and differential plot of calculated *versus* observed line (red) profiles are marked.

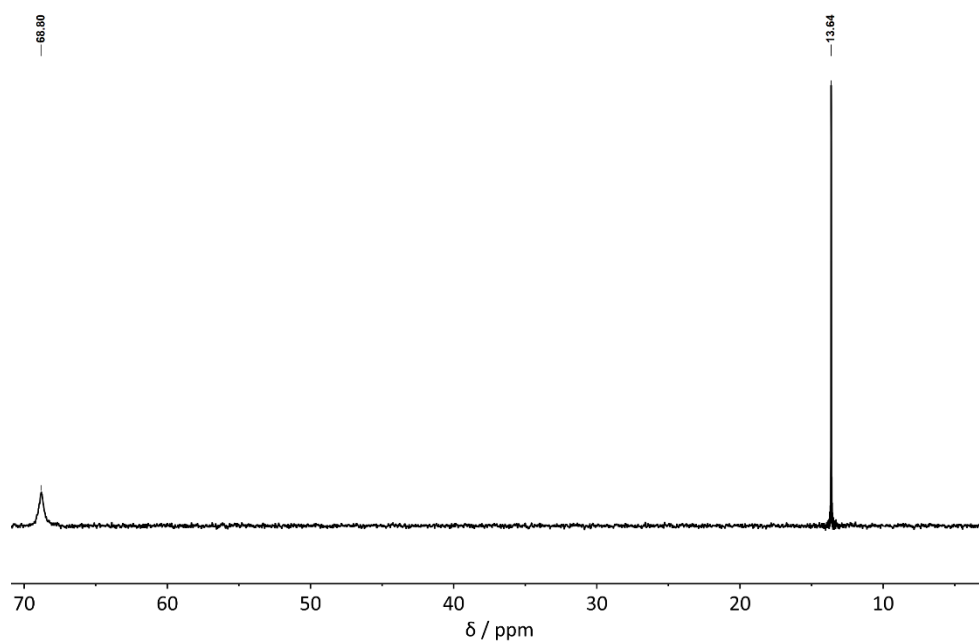

Figure 22:  $^{13}\text{C}\{^1\text{H}\}$  NMR spectrum of  $[\text{BeBr}_2(\text{OEt}_2)_2]$  (**1b**) in  $\text{CDCl}_3$  at  $T = 300$  K.

### 1.3 [BeI<sub>2</sub>(OEt<sub>2</sub>)<sub>2</sub>] (**1c**):

#### 1.3.1 Solvent – Et<sub>2</sub>O

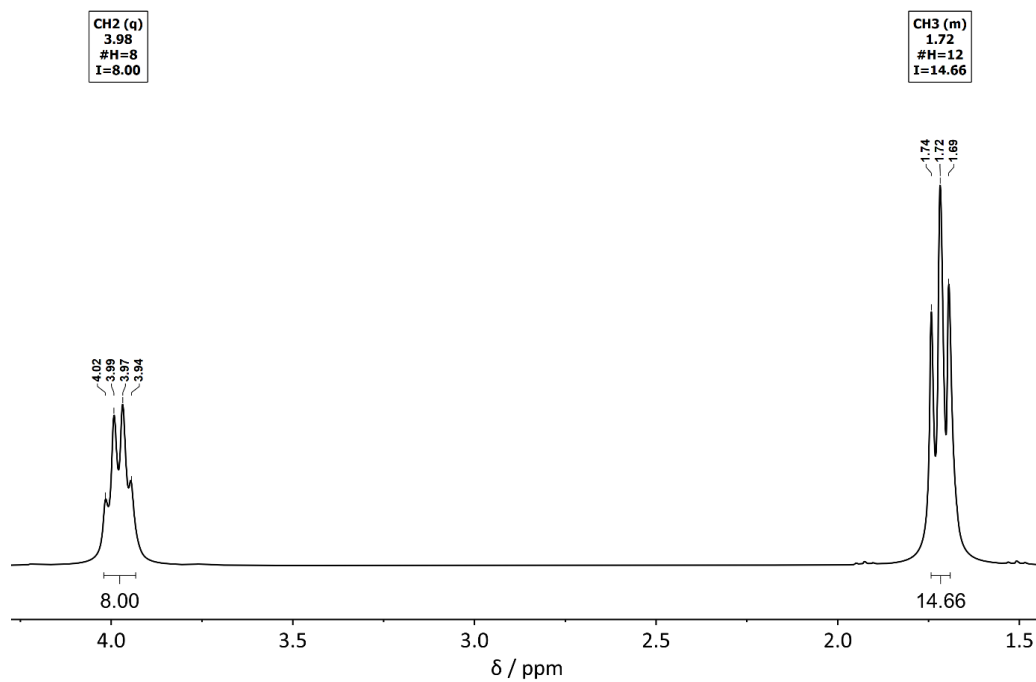

Figure 23: <sup>1</sup>H NMR spectrum of [BeI<sub>2</sub>(OEt<sub>2</sub>)<sub>2</sub>] (**1c**) in Et<sub>2</sub>O at *T* = 300 K.

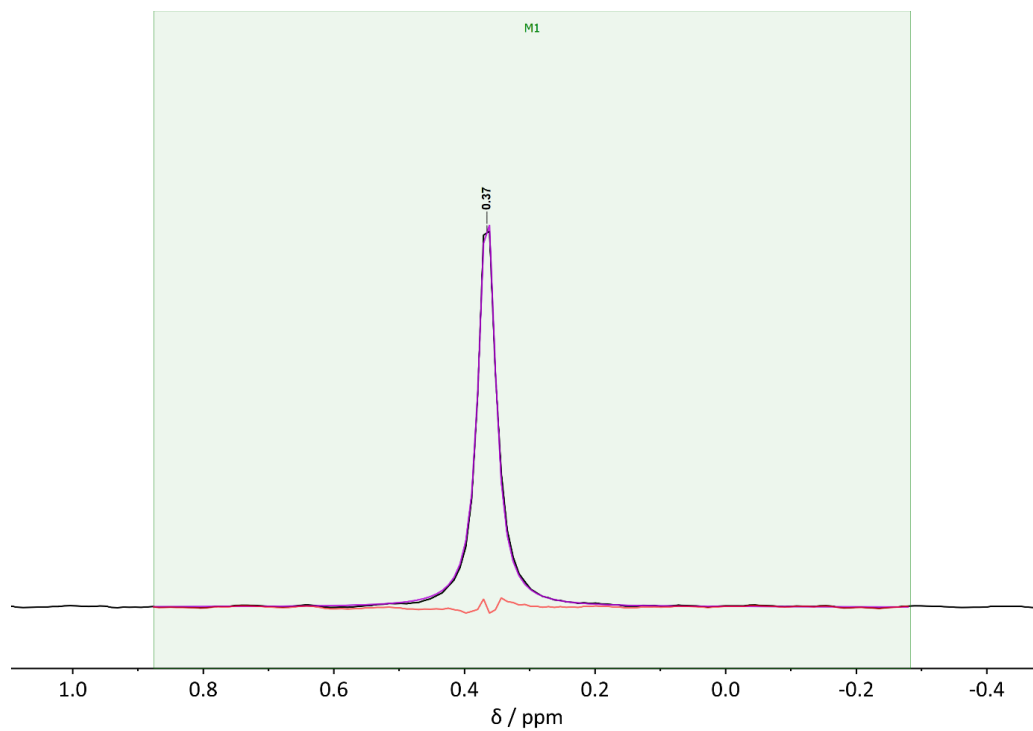

Figure 24: <sup>9</sup>Be NMR spectrum of [BeI<sub>2</sub>(OEt<sub>2</sub>)<sub>2</sub>] (**1c**) in Et<sub>2</sub>O at *T* = 300 K. Line fitting profiles (purple) and differential plot of calculated *versus* observed line (red) profiles are marked.

### 1.3.2 Solvent – C<sub>6</sub>D<sub>6</sub>

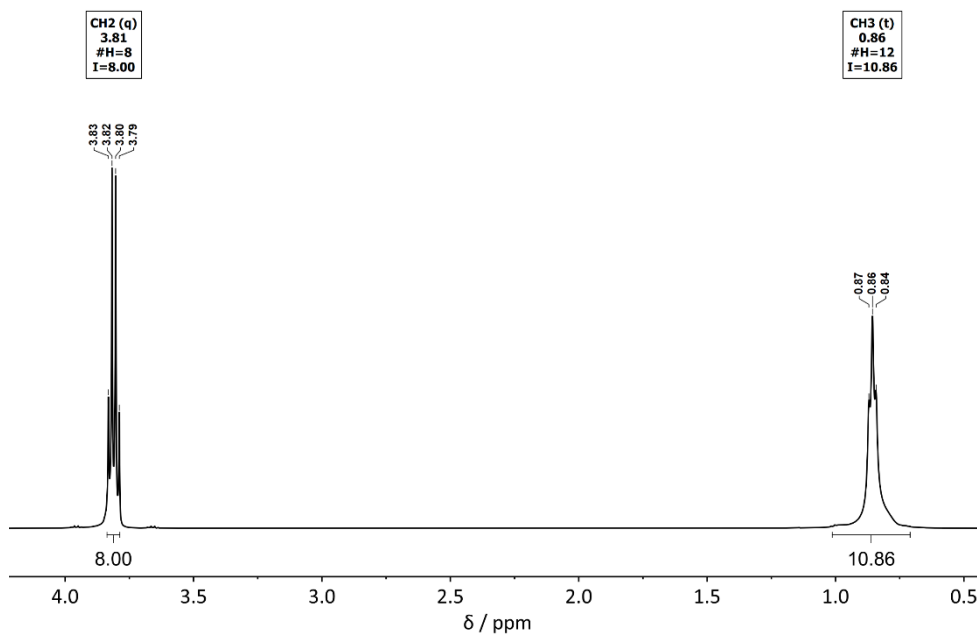

Figure 25: <sup>1</sup>H NMR spectrum of [BeI<sub>2</sub>(OEt<sub>2</sub>)<sub>2</sub>] (**1c**) in C<sub>6</sub>D<sub>6</sub> at *T* = 300 K.

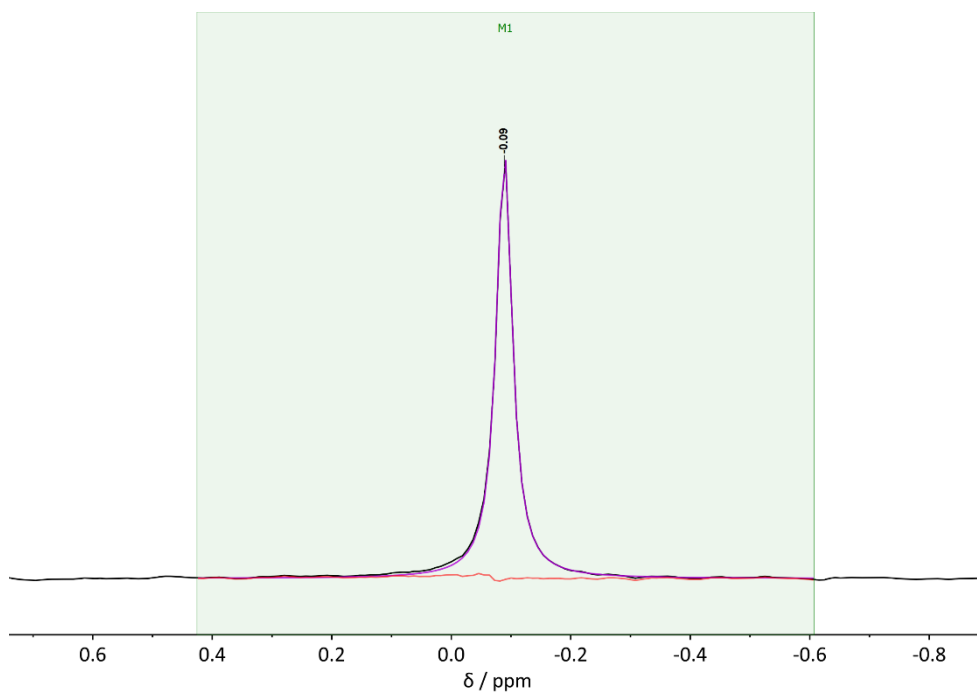

Figure 26: <sup>9</sup>Be NMR spectrum of [BeI<sub>2</sub>(OEt<sub>2</sub>)<sub>2</sub>] (**1c**) in C<sub>6</sub>D<sub>6</sub> at *T* = 300 K. Line fitting profiles (purple) and differential plot of calculated *versus* observed line (red) profiles are marked.

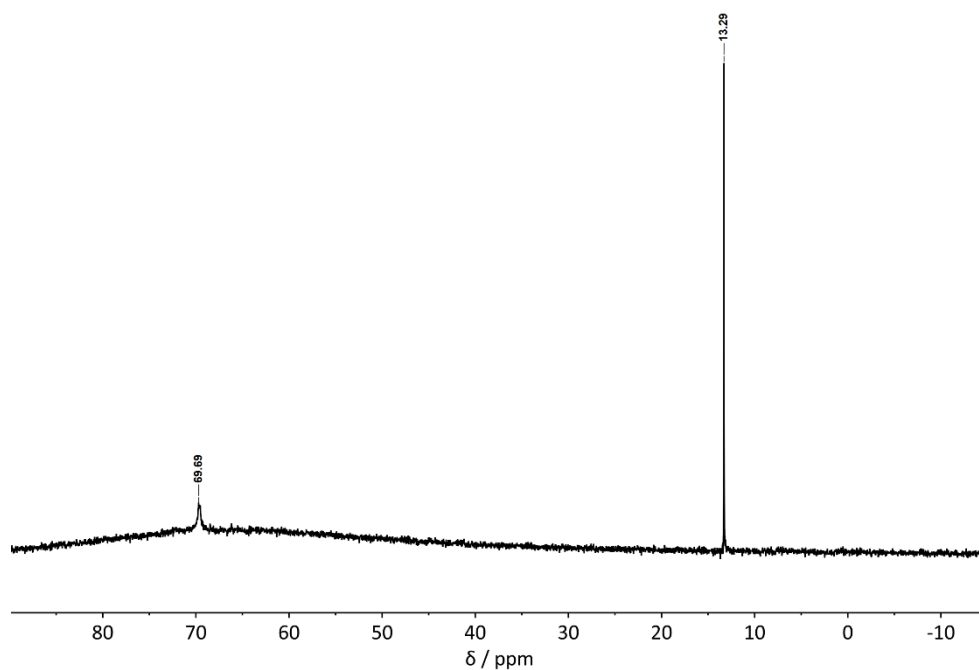

Figure 27:  $^{13}\text{C}\{^1\text{H}\}$  NMR spectrum of  $[\text{BeI}_2(\text{OEt}_2)_2]$  (**1c**) in  $\text{C}_6\text{D}_6$  at  $T = 300\text{ K}$ .

### 1.3.3 Solvent – $\text{CD}_2\text{Cl}_2$

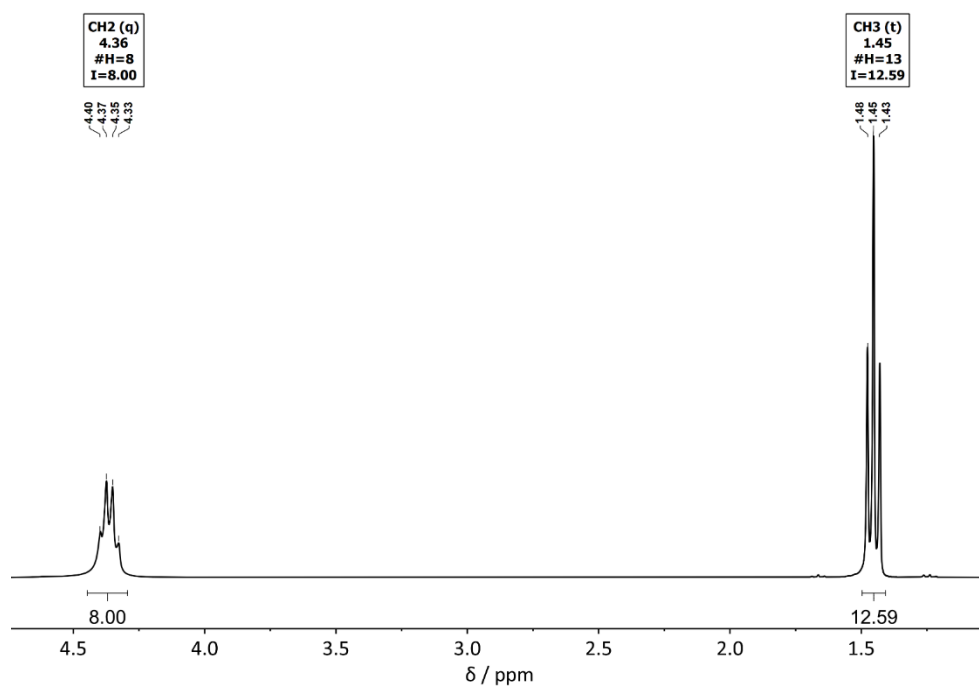

Figure 28:  $^1\text{H}$  NMR spectrum of  $[\text{BeI}_2(\text{OEt}_2)_2]$  (**1c**) in  $\text{CD}_2\text{Cl}_2$  at  $T = 300\text{ K}$ .

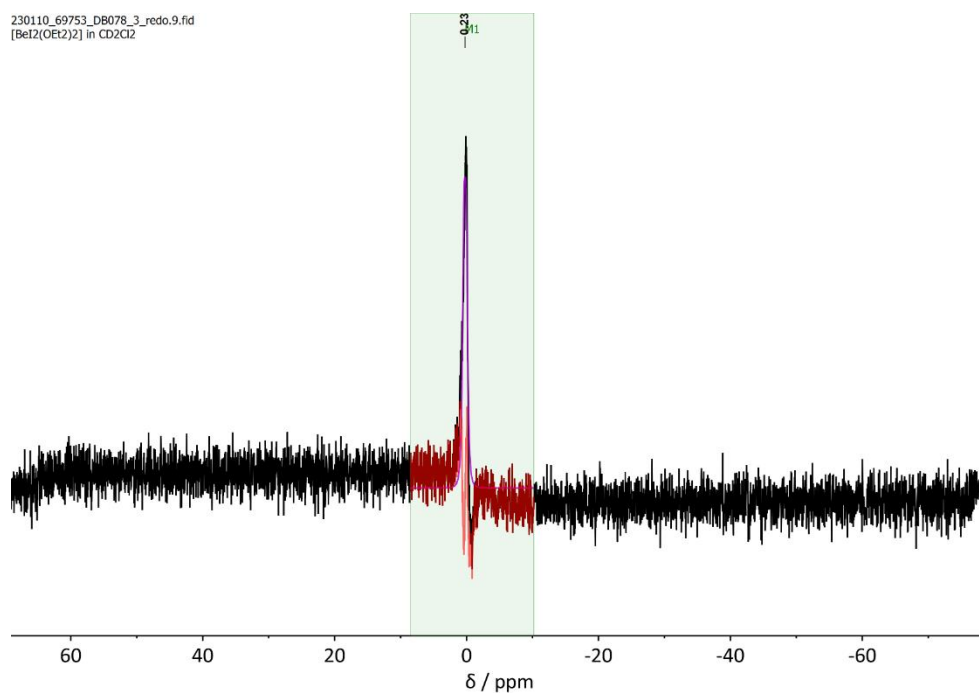

Figure 29:  $^9\text{Be}$  NMR spectrum of  $[\text{BeI}_2(\text{OEt}_2)_2]$  (**1c**) in  $\text{CD}_2\text{Cl}_2$  at  $T = 300$  K. Line fitting profiles (purple) and differential plot of calculated *versus* observed line (red) profiles are marked.

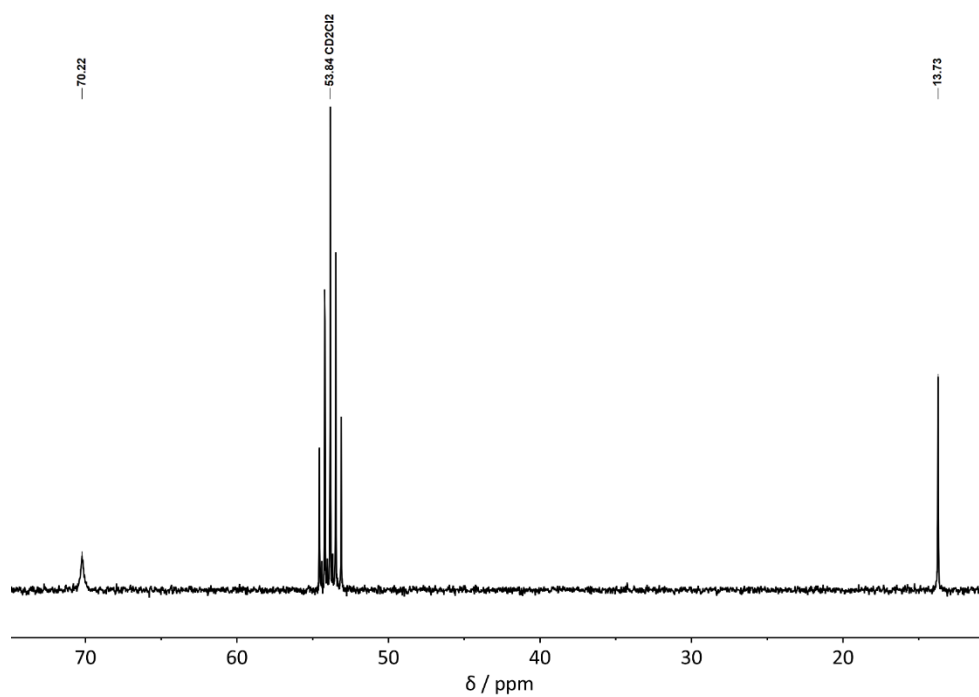

Figure 30:  $^{13}\text{C}\{^1\text{H}\}$  NMR spectrum of  $[\text{BeI}_2(\text{OEt}_2)_2]$  (**1c**) in  $\text{CD}_2\text{Cl}_2$  at  $T = 300$  K.



### 1.3.4 Solvent – CDCl<sub>3</sub>

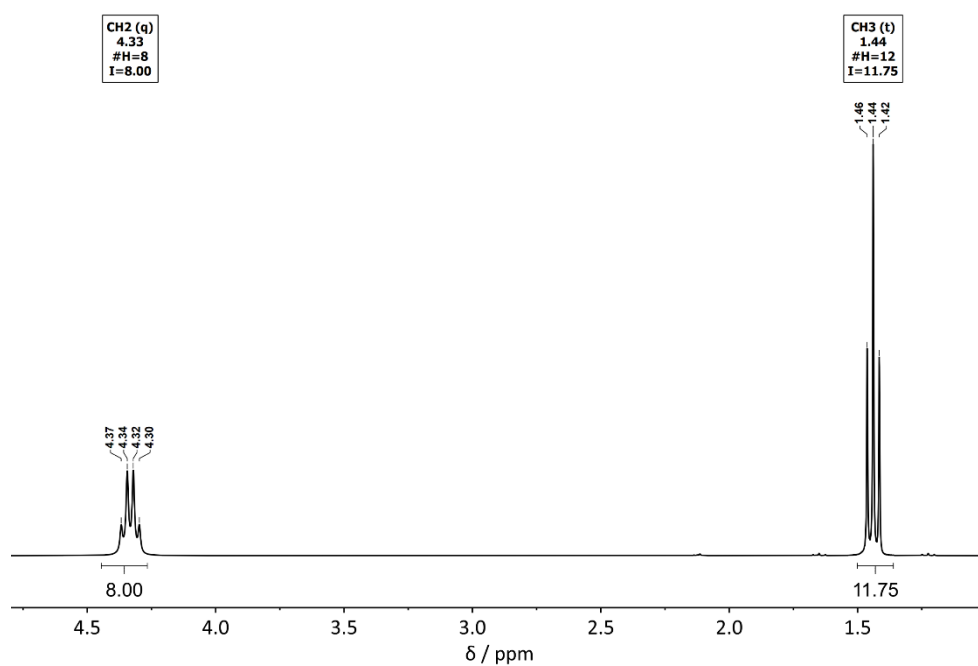

Figure 31: <sup>1</sup>H NMR spectrum of [BeI<sub>2</sub>(OEt<sub>2</sub>)<sub>2</sub>] (**1c**) in CDCl<sub>3</sub> at *T* = 300 K.

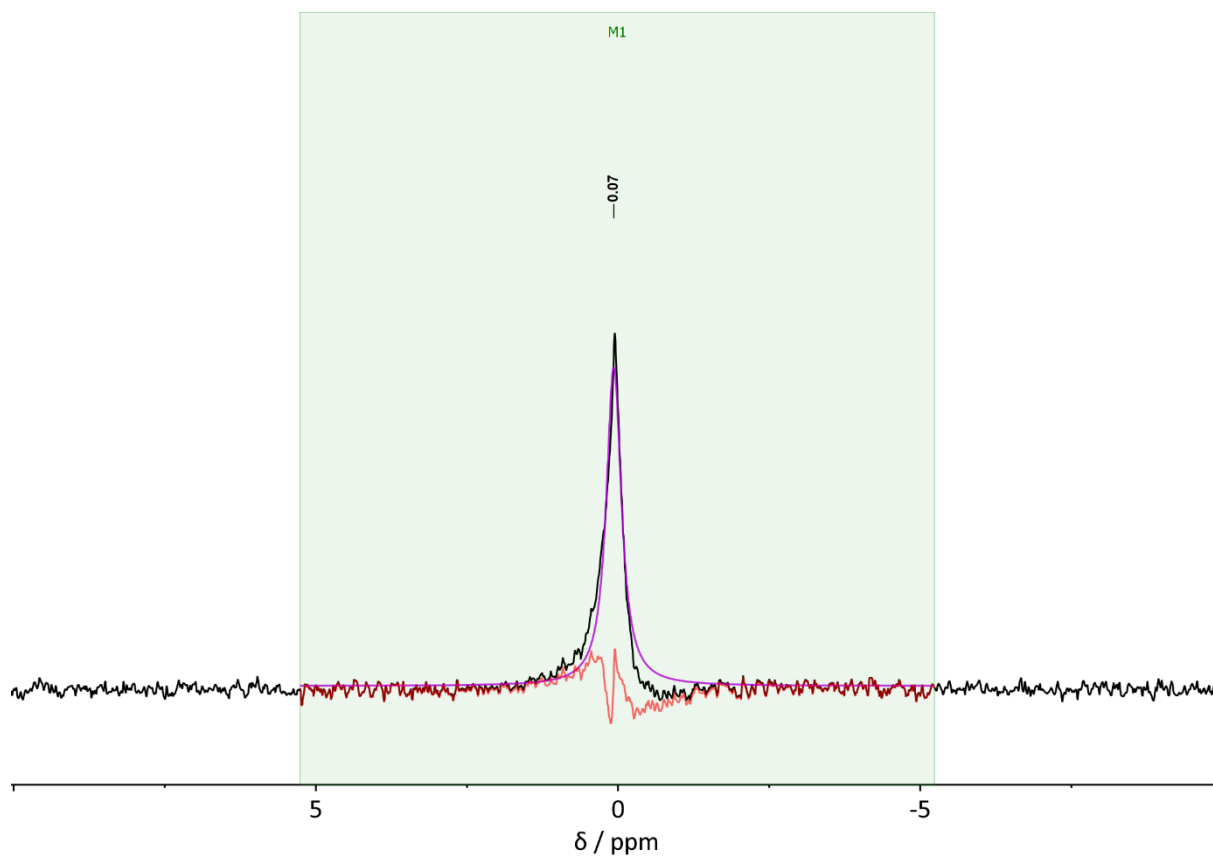

Figure 32: <sup>9</sup>Be NMR spectrum of [BeI<sub>2</sub>(OEt<sub>2</sub>)<sub>2</sub>] (**1c**) in CDCl<sub>3</sub> at *T* = 300 K. Line fitting profiles (purple) and differential plot of calculated *versus* observed line (red) profiles are marked.

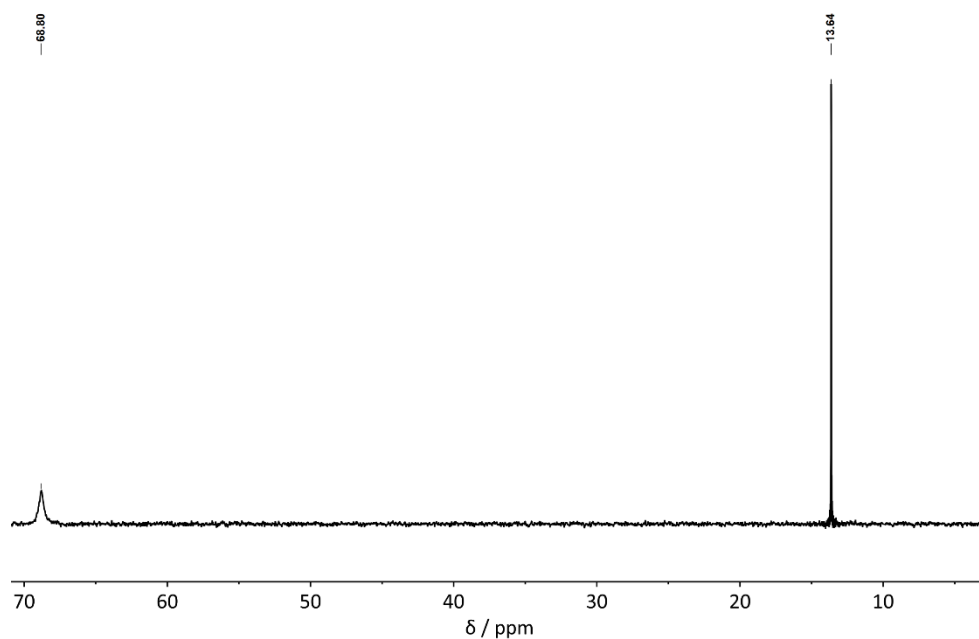

Figure 33:  $^{13}\text{C}\{^1\text{H}\}$  NMR spectrum of  $[\text{BeI}_2(\text{OEt}_2)_2]$  (**1c**) in  $\text{CDCl}_3$  at  $T = 300$  K.

## 1.4 $[\text{BeCl}_2(\text{thf})_2]$ (**2a**):

### 1.4.1 Solvent – $\text{thf-}d_8$

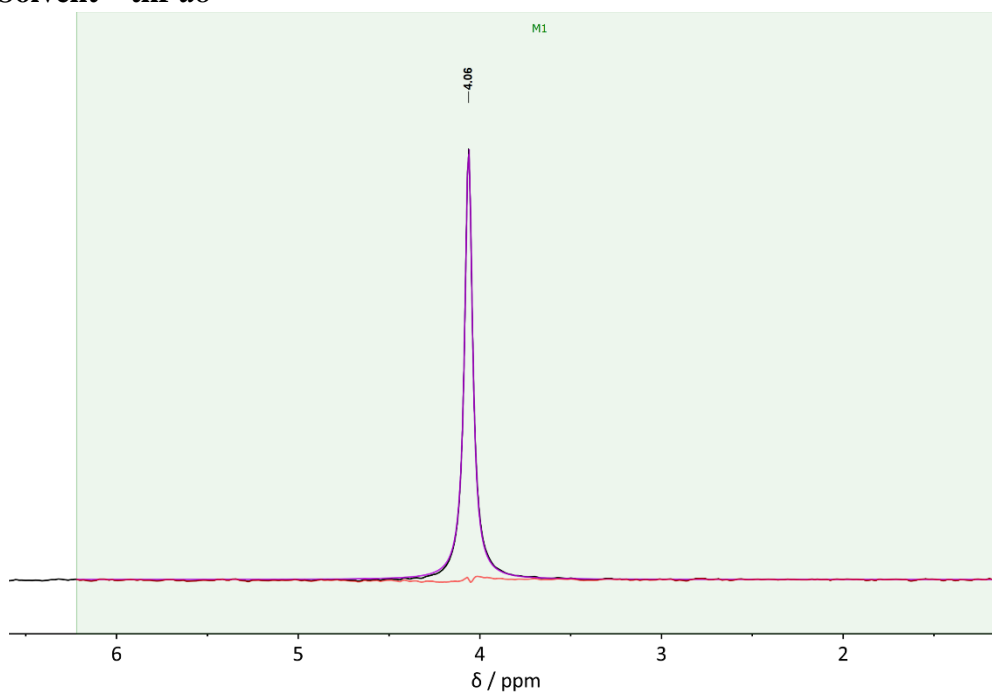

Figure 34:  $^9\text{Be}$  NMR spectrum of  $[\text{BeCl}_2(\text{thf})_2]$  (**2a**) in  $\text{thf-}d_8$  at  $T = 300$  K. Line fitting profiles (purple) and differential plot of calculated *versus* observed line (red) profiles are marked.

### 1.4.2 Solvent – C<sub>6</sub>D<sub>6</sub>

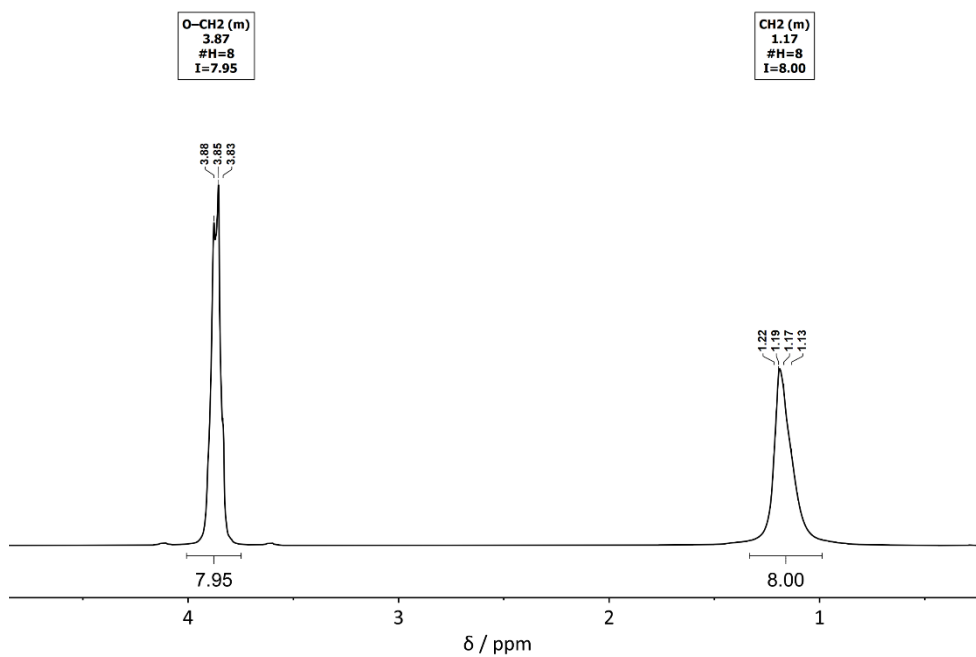

Figure 35: <sup>1</sup>H NMR spectrum of [BeCl<sub>2</sub>(thf)<sub>2</sub>] (**2a**) in C<sub>6</sub>D<sub>6</sub> at *T* = 300 K.

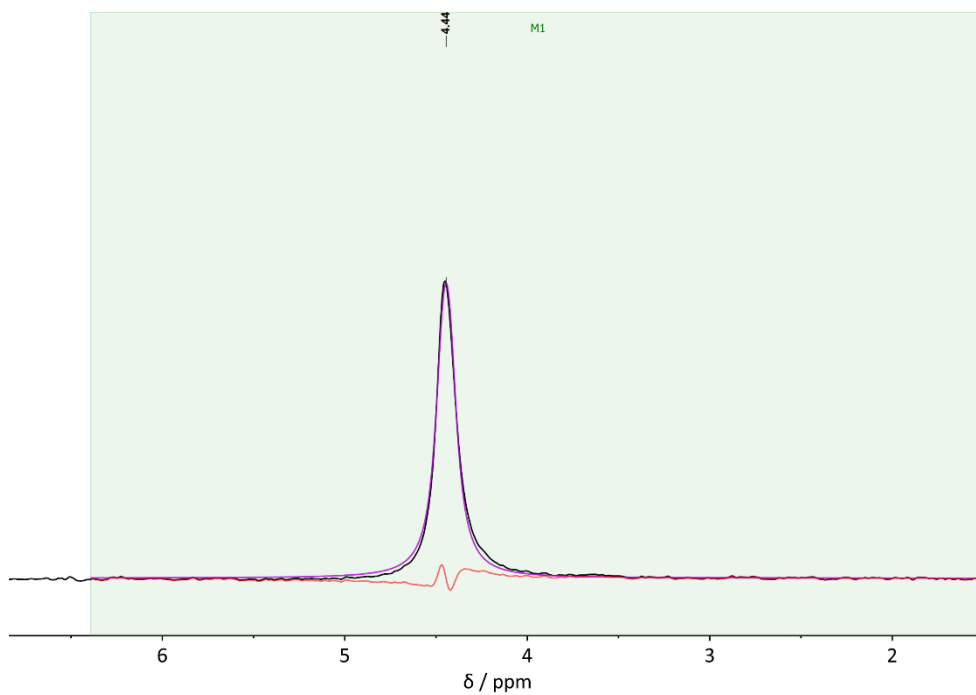

Figure 36: <sup>9</sup>Be NMR spectrum of [BeCl<sub>2</sub>(thf)<sub>2</sub>] (**2a**) in C<sub>6</sub>D<sub>6</sub> at *T* = 300 K. Line fitting profiles (purple) and differential plot of calculated *versus* observed line (red) profiles are marked.

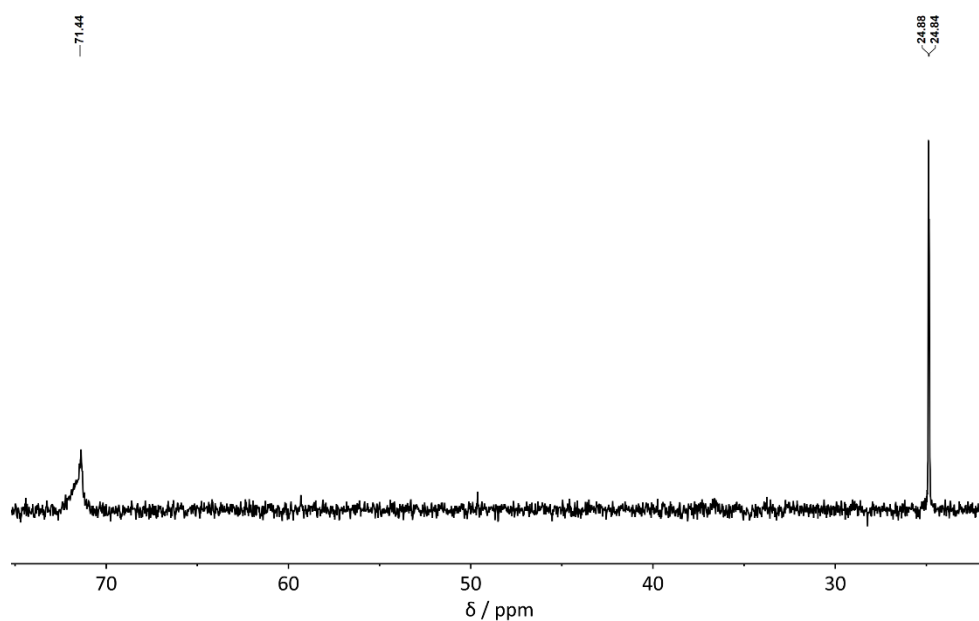

Figure 37:  $^{13}\text{C}\{^1\text{H}\}$  NMR spectrum of  $[\text{BeCl}_2(\text{thf})_2]$  (**2a**) in  $\text{C}_6\text{D}_6$  at  $T = 300$  K.

### 1.4.3 Solvent – $\text{CD}_2\text{Cl}_2$

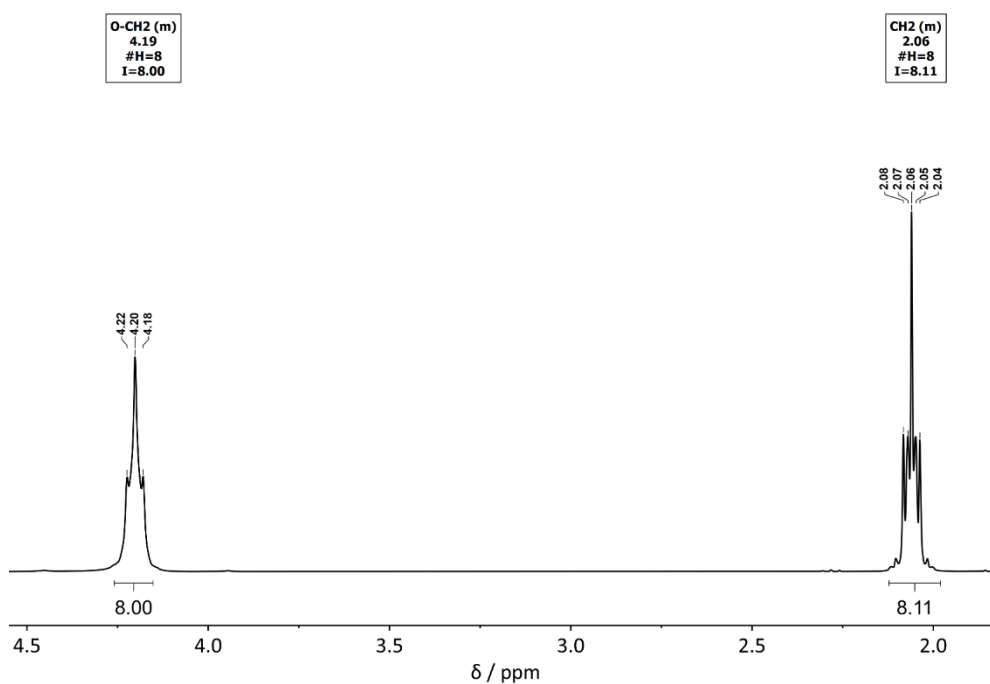

Figure 38:  $^1\text{H}$  NMR spectrum of  $[\text{BeCl}_2(\text{thf})_2]$  (**2a**) in  $\text{CD}_2\text{Cl}_2$  at  $T = 300$  K.

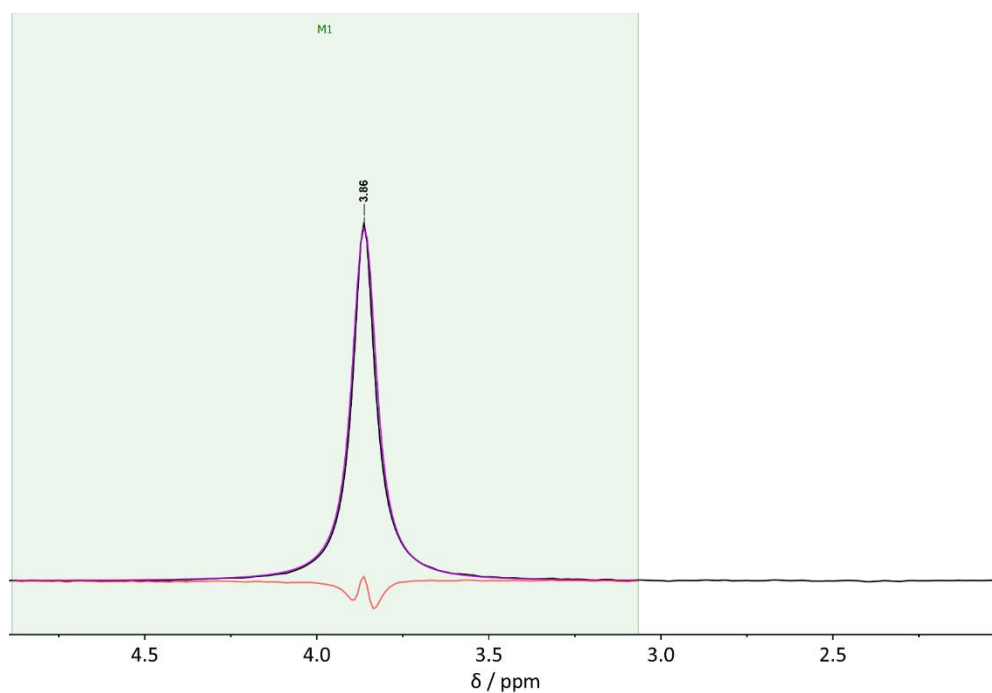

Figure 39:  $^9\text{Be}$  NMR spectrum of  $[\text{BeCl}_2(\text{thf})_2]$  (**2a**) in  $\text{CD}_2\text{Cl}_2$  at  $T = 300$  K. Line fitting profiles (purple) and differential plot of calculated *versus* observed line (red) profiles are marked.

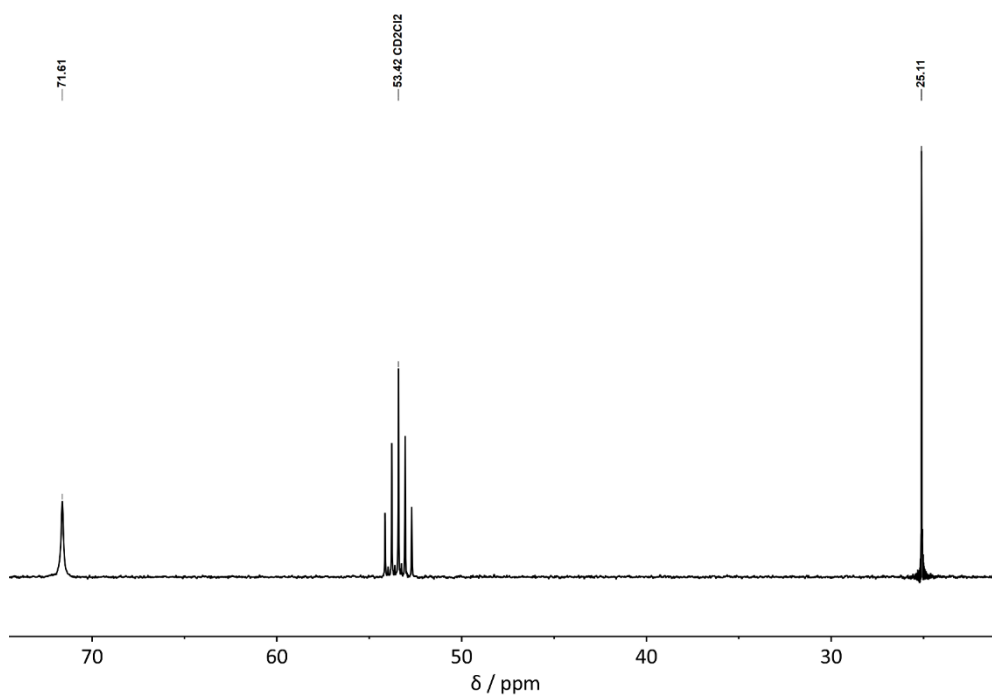

Figure 40:  $^{13}\text{C}\{^1\text{H}\}$  NMR spectrum of  $[\text{BeCl}_2(\text{thf})_2]$  (**2a**) in  $\text{CD}_2\text{Cl}_2$  at  $T = 300$  K.

#### 1.4.4 Solvent – CDCl<sub>3</sub>

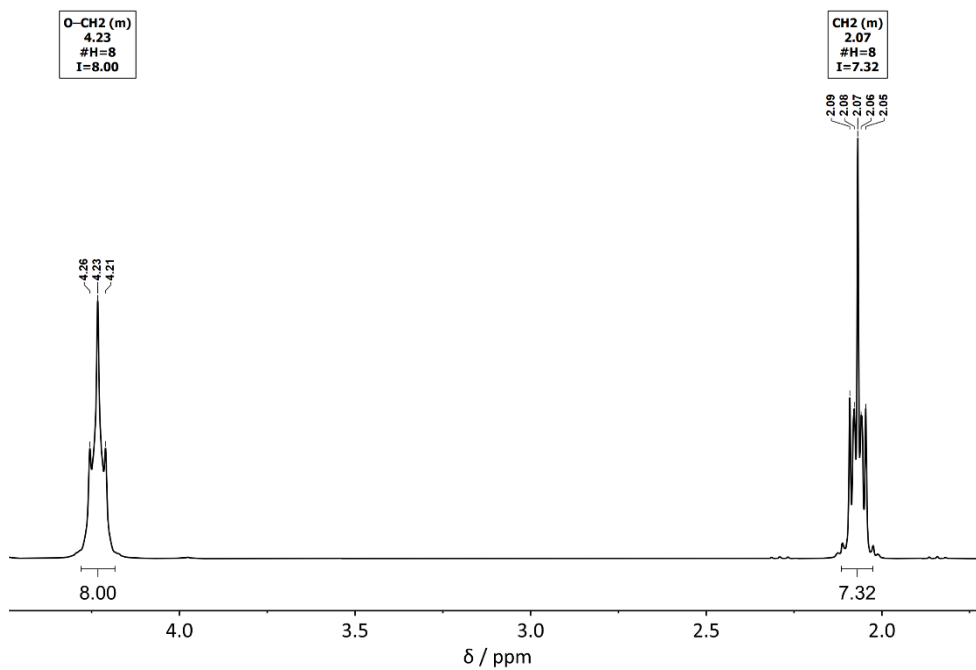

Figure 41: <sup>1</sup>H NMR spectrum of [BeCl<sub>2</sub>(thf)<sub>2</sub>] (**2a**) in CDCl<sub>3</sub> at *T* = 300 K.

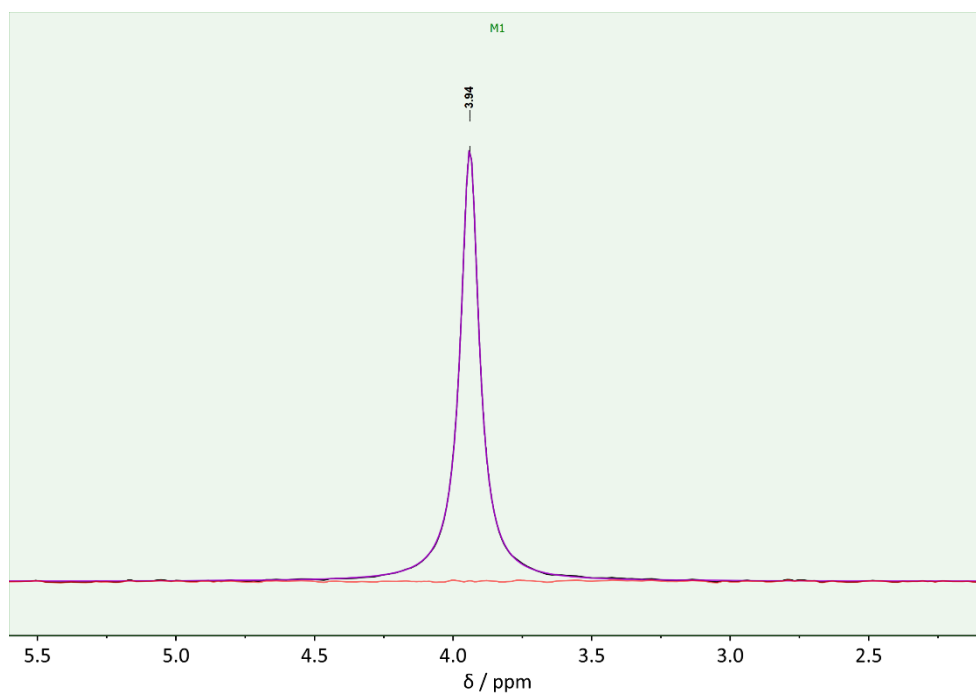

Figure 42: <sup>9</sup>Be NMR spectrum of [BeCl<sub>2</sub>(thf)<sub>2</sub>] (**2a**) in CDCl<sub>3</sub> at *T* = 300 K. Line fitting profiles (purple) and differential plot of calculated *versus* observed line (red) profiles are marked.

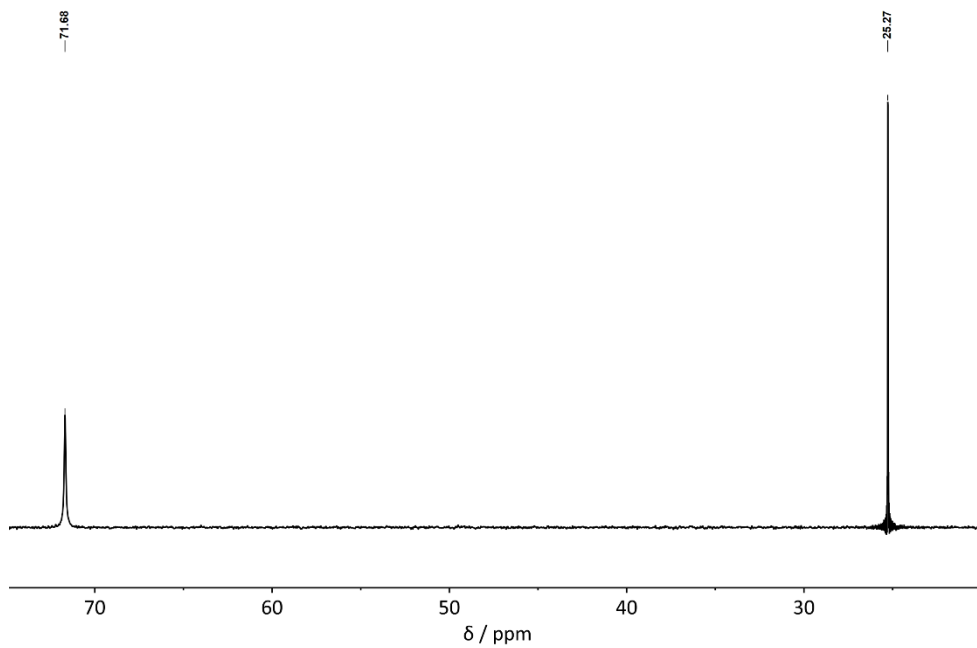

Figure 43:  $^{13}\text{C}$  NMR spectrum of  $[\text{BeCl}_2(\text{thf})_2]$  (**2a**) in  $\text{CDCl}_3$  at  $T = 300$  K.

## 1.5 $[\text{BeBr}_2(\text{thf})_2]$ (**2b**):

### 1.5.1 Solvent – $\text{thf-}d_8$

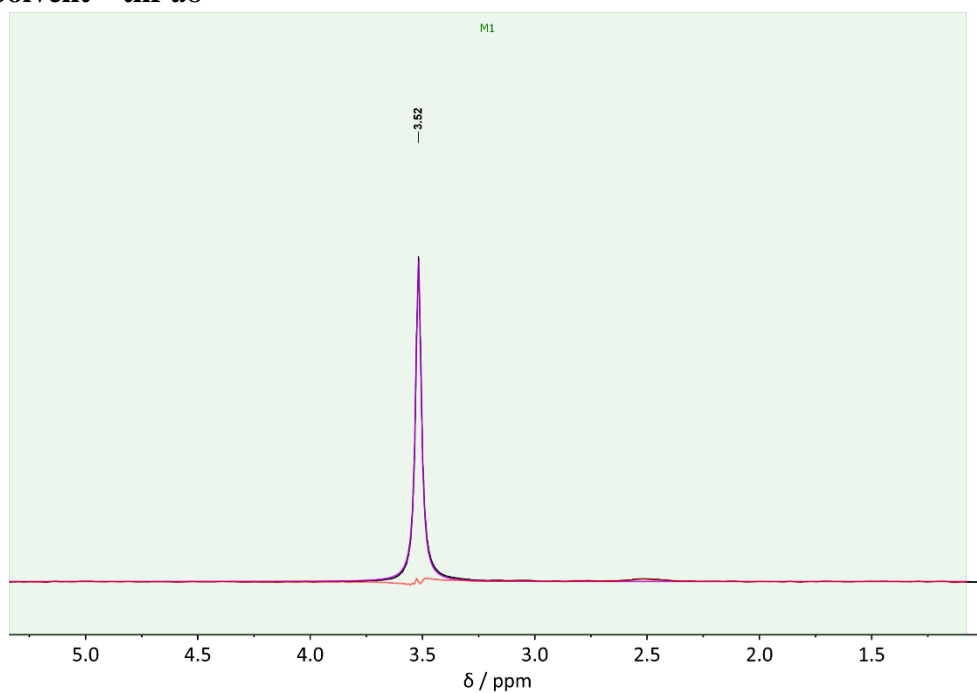

Figure 44:  $^9\text{Be}$  NMR spectrum of  $[\text{BeBr}_2(\text{thf})_2]$  (**2b**) in  $\text{thf-}d_8$  at  $T = 300$  K. Line fitting profiles (purple) and differential plot of calculated *versus* observed line (red) profiles are marked.

## 1.5.2 Solvent – C<sub>6</sub>D<sub>6</sub>

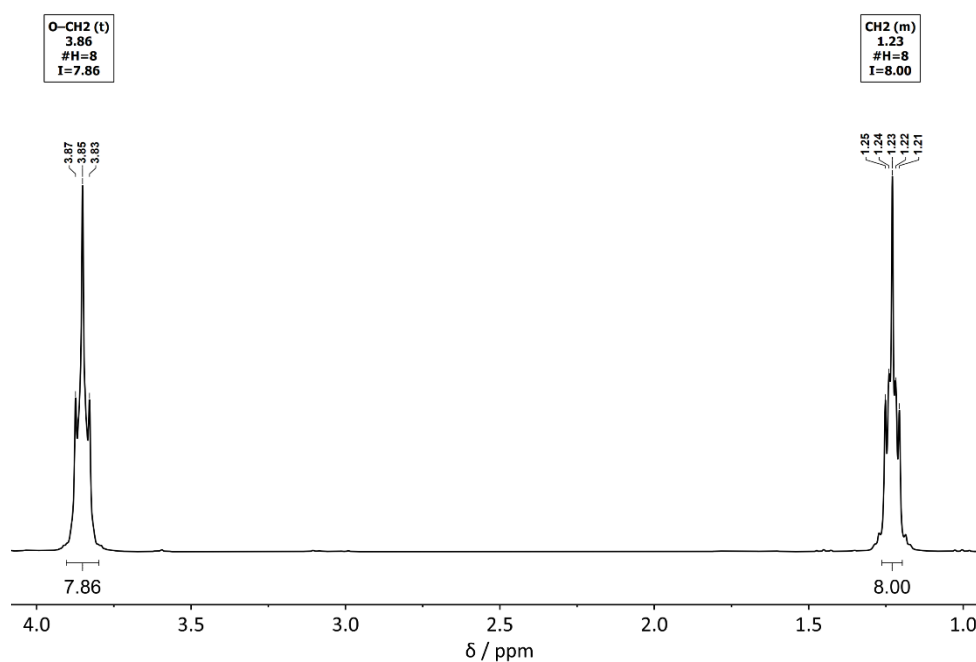

Figure 45: <sup>1</sup>H NMR spectrum of [BeBr<sub>2</sub>(thf)<sub>2</sub>] (**2b**) in C<sub>6</sub>D<sub>6</sub> at T = 300 K.

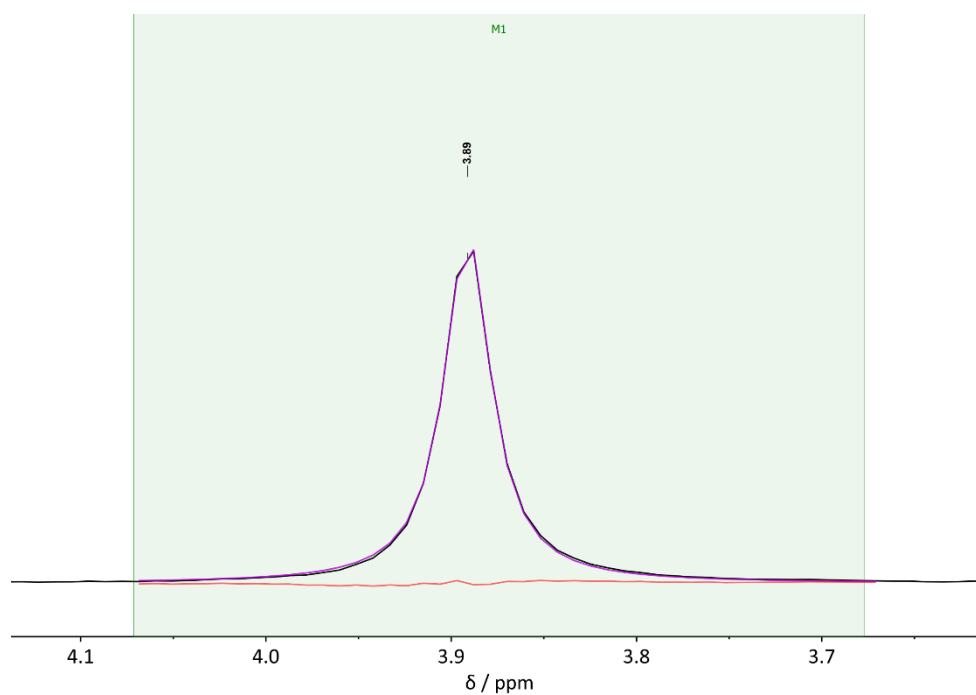

Figure 46: <sup>9</sup>Be NMR spectrum of [BeBr<sub>2</sub>(thf)<sub>2</sub>] (**2b**) in C<sub>6</sub>D<sub>6</sub> at T = 300 K. Line fitting profiles (purple) and differential plot of calculated *versus* observed line (red) profiles are marked.



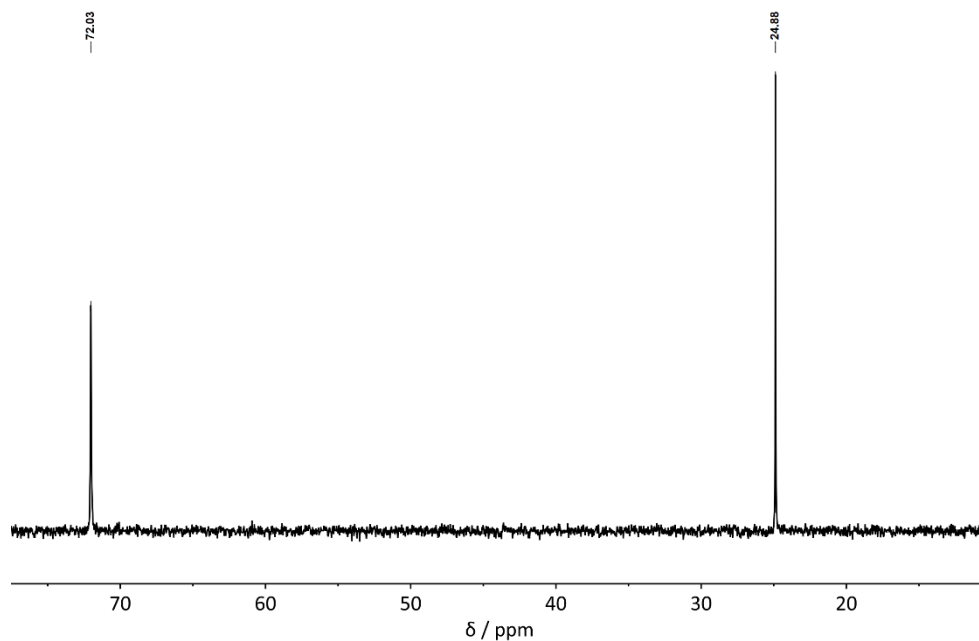

Figure 47:  $^{13}\text{C}\{^1\text{H}\}$  NMR spectrum of  $[\text{BeBr}_2(\text{thf})_2]$  (**2b**) in  $\text{C}_6\text{D}_6$  at  $T = 300\text{ K}$ .

### 1.5.3 Solvent – $\text{CD}_2\text{Cl}_2$

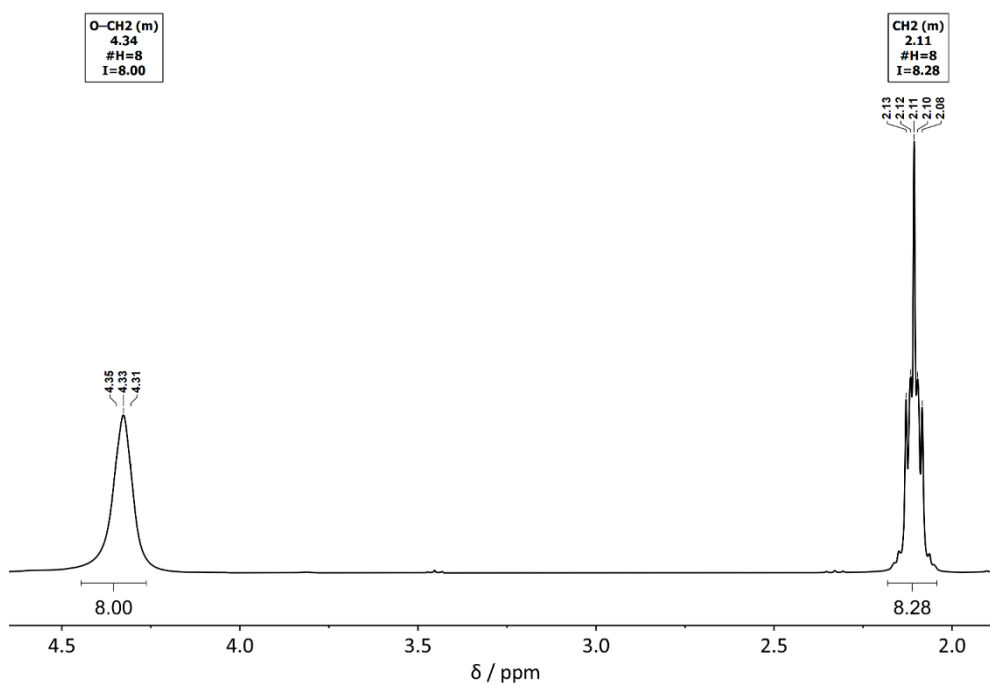

Figure 48:  $^1\text{H}$  NMR spectrum of  $[\text{BeBr}_2(\text{thf})_2]$  (**2b**) in  $\text{CD}_2\text{Cl}_2$  at  $T = 300\text{ K}$ .

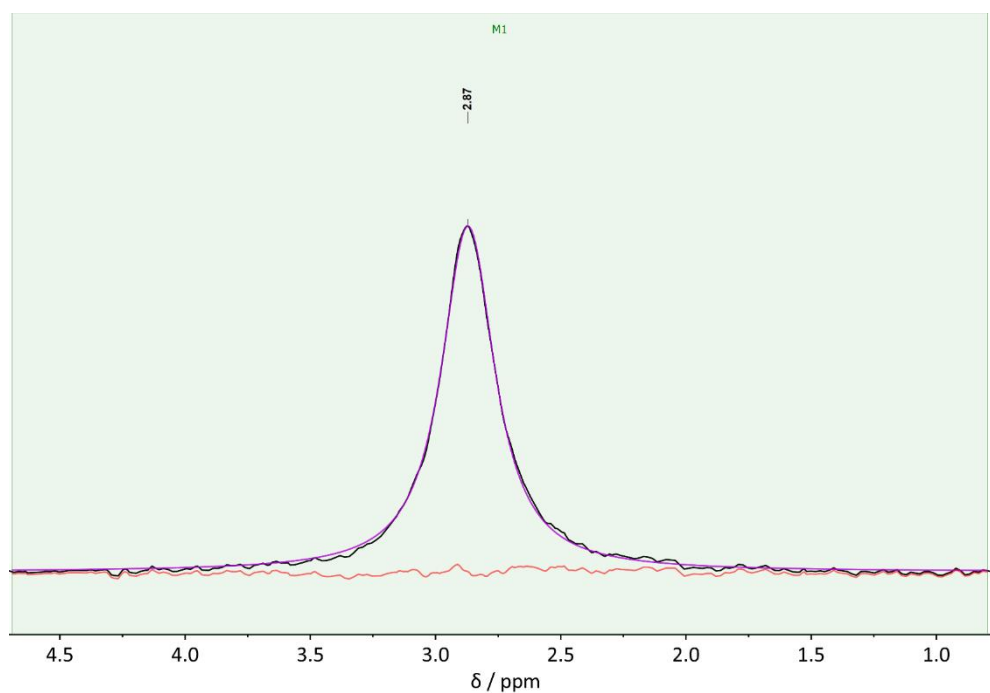

Figure 49:  $^9\text{Be}$  NMR spectrum of  $[\text{BeBr}_2(\text{thf})_2]$  (**2b**) in  $\text{CD}_2\text{Cl}_2$  at  $T = 300$  K. Line fitting profiles (purple) and differential plot of calculated *versus* observed line (red) profiles are marked.

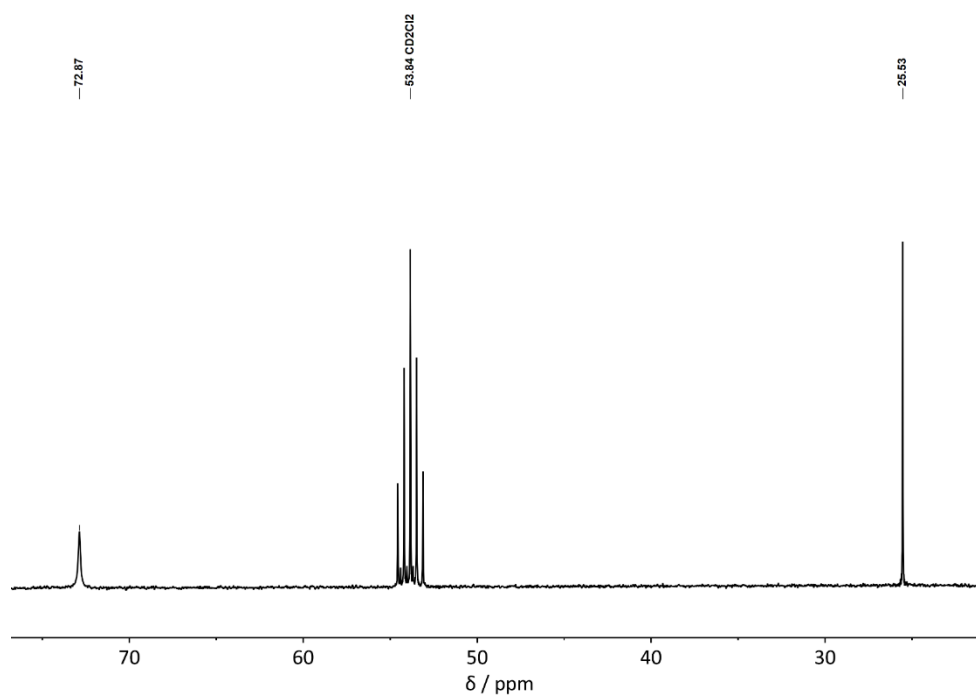

Figure 50:  $^{13}\text{C}\{^1\text{H}\}$  NMR spectrum of  $[\text{BeBr}_2(\text{thf})_2]$  (**2b**) in  $\text{CD}_2\text{Cl}_2$  at  $T = 300$  K.

### 1.5.4 Solvent – CDCl<sub>3</sub>

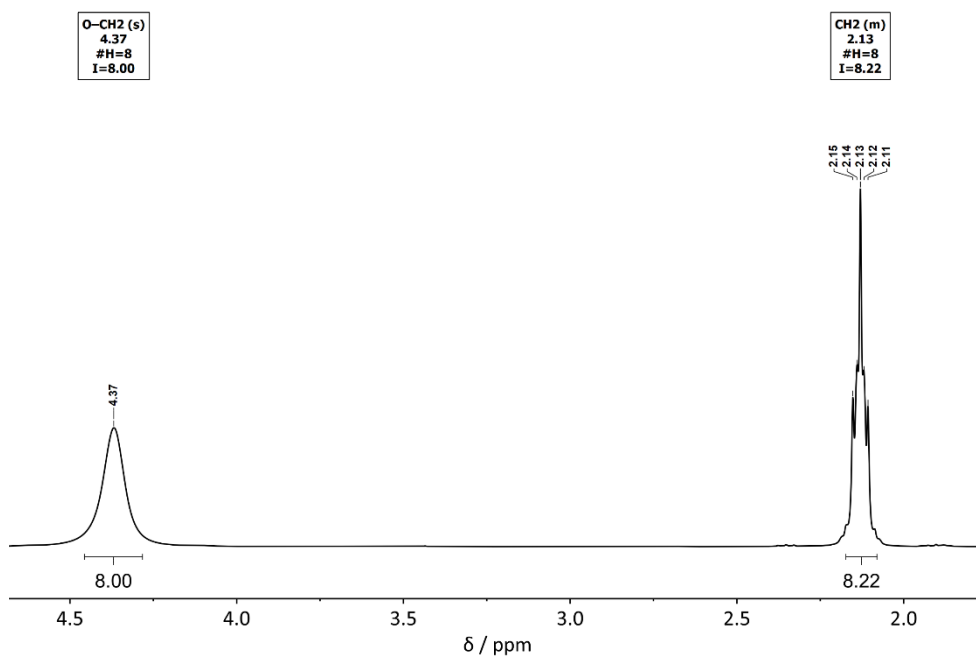

Figure 51: <sup>1</sup>H NMR spectrum of [BeBr<sub>2</sub>(thf)<sub>2</sub>] (**2b**) in CDCl<sub>3</sub> at T = 300 K.

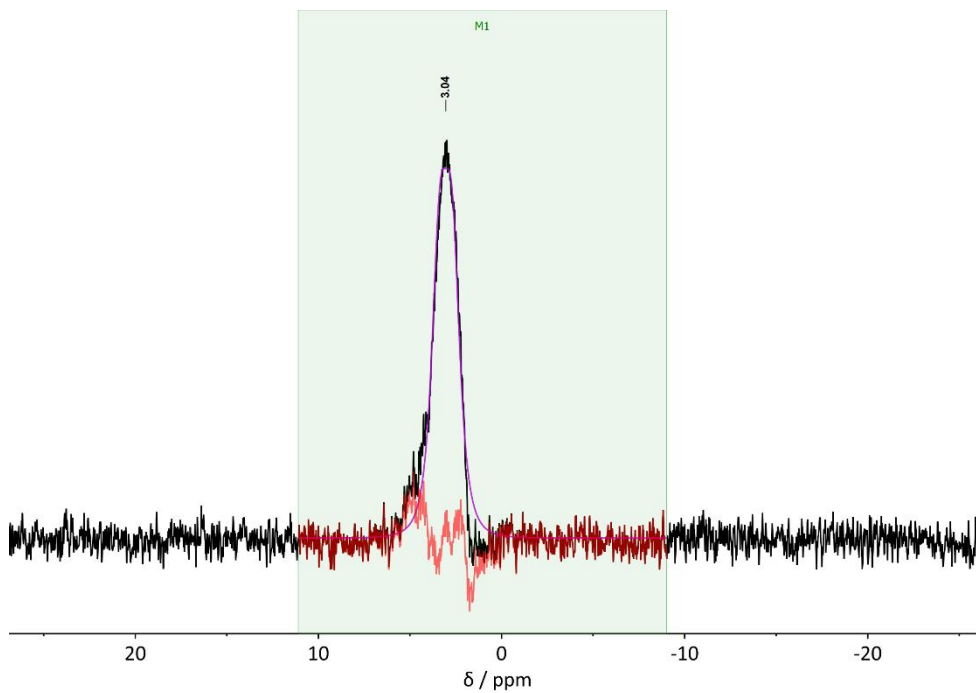

Figure 52: <sup>9</sup>Be NMR spectrum of [BeBr<sub>2</sub>(thf)<sub>2</sub>] (**2b**) in CDCl<sub>3</sub> at T = 300 K. Line fitting profiles (purple) and differential plot of calculated *versus* observed line (red) profiles are marked.

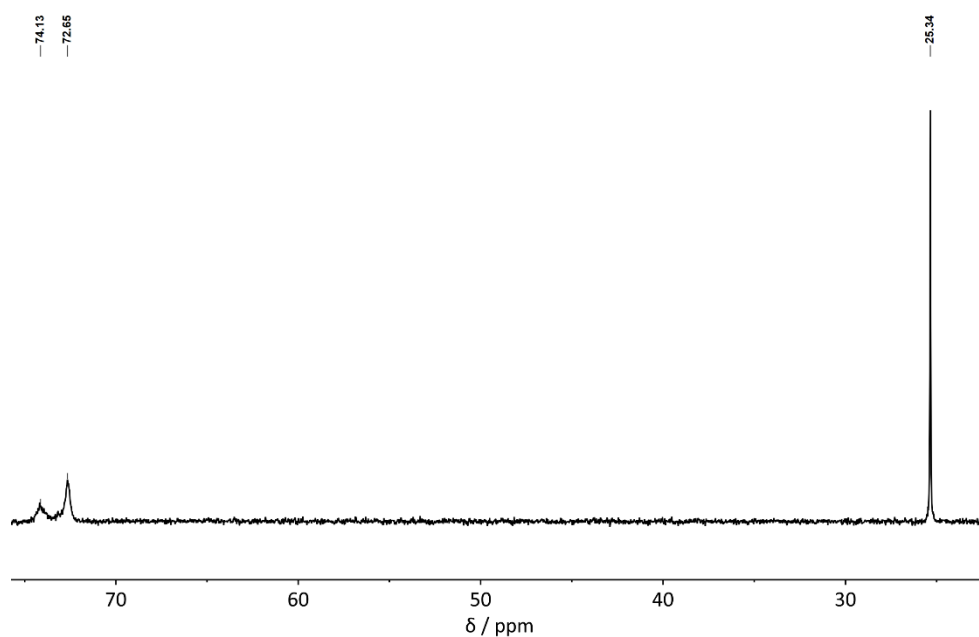

Figure 53:  $^{13}\text{C}\{^1\text{H}\}$  NMR spectrum of  $[\text{BeBr}_2(\text{thf})_2]$  (**2b**) in  $\text{CDCl}_3$  at  $T = 300$  K.

## 1.6 $[\text{BeI}_2(\text{thf})_2]$ (**2c**):

### 1.6.1 Solvent – $\text{thf-}d_8$

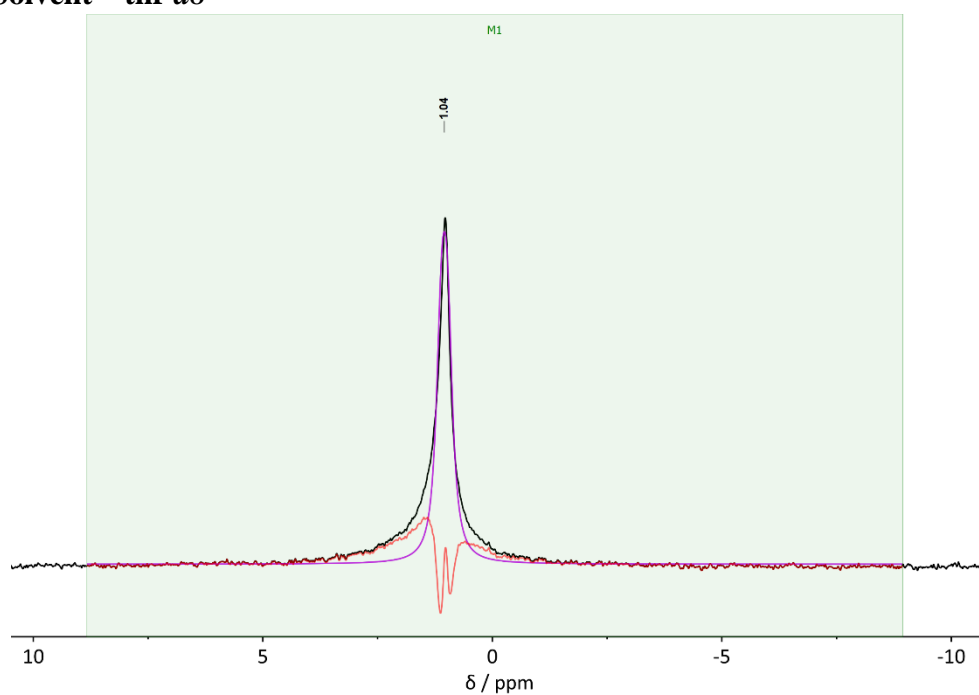

Figure 54:  $^9\text{Be}$  NMR spectrum of  $[\text{BeI}_2(\text{thf})_2]$  (**2c**) in  $\text{thf-}d_8$  at  $T = 300$  K. Line fitting profiles (purple) and differential plot of calculated *versus* observed line (red) profiles are marked.

## 1.6.2 Solvent – C<sub>6</sub>D<sub>6</sub>

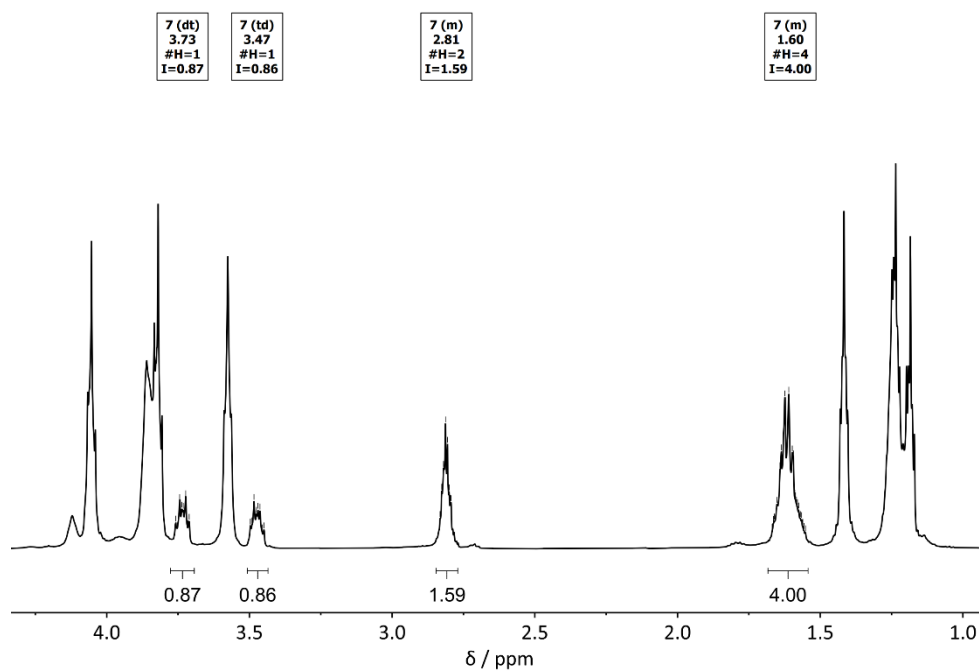

Figure 55: <sup>1</sup>H NMR spectrum of Mixture of [BeI<sub>2</sub>(thf)<sub>2</sub>] (**2c**), [BeI(thf)<sub>3</sub>]<sup>+</sup> (**4**), [Be(thf)<sub>4</sub>]<sup>2+</sup> (**5**), and [Be(μ<sub>2</sub>-O(CH<sub>2</sub>)<sub>4</sub>I)(thf)<sub>2</sub>] (**6**) in C<sub>6</sub>D<sub>6</sub> at *T* = 300 K. Signals corresponding to **7** are marked with the integer 7. Markers for **2c**, **4**, **5** and **6** are omitted for clarity.

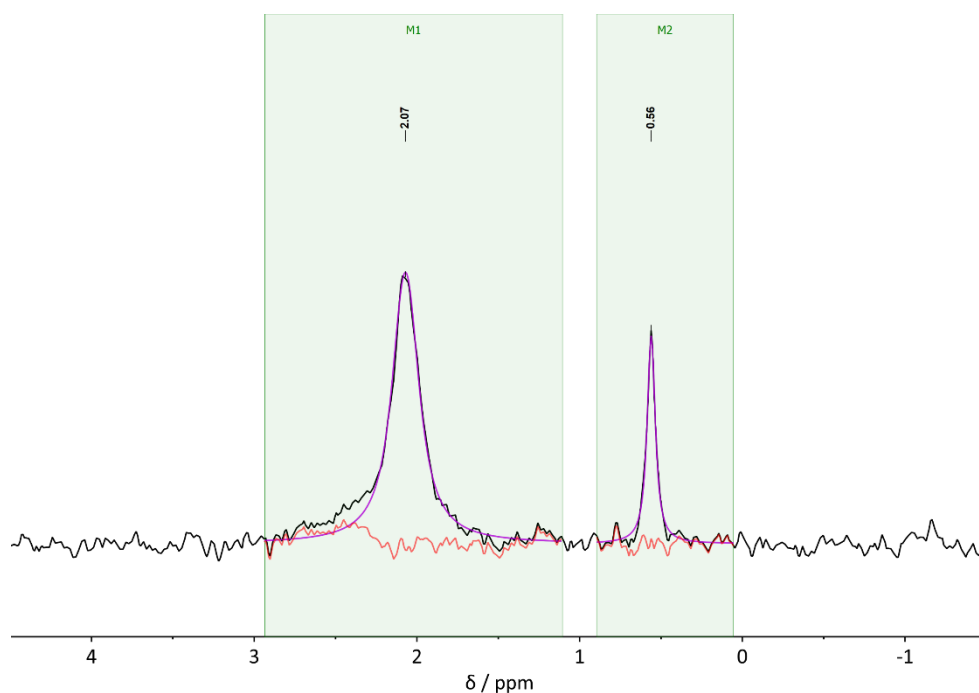

Figure 56: <sup>9</sup>Be NMR spectrum of Mixture of [BeI<sub>2</sub>(thf)<sub>2</sub>] (**2c**), [BeI(thf)<sub>3</sub>]<sup>+</sup> (**4**), [Be(thf)<sub>4</sub>]<sup>2+</sup> (**5**), and [Be(μ<sub>2</sub>-O(CH<sub>2</sub>)<sub>4</sub>I)(thf)<sub>2</sub>] (**6**) in C<sub>6</sub>D<sub>6</sub> at *T* = 300 K. Line fitting profiles (purple) and differential plot of calculated *versus* observed line (red) profiles are marked.

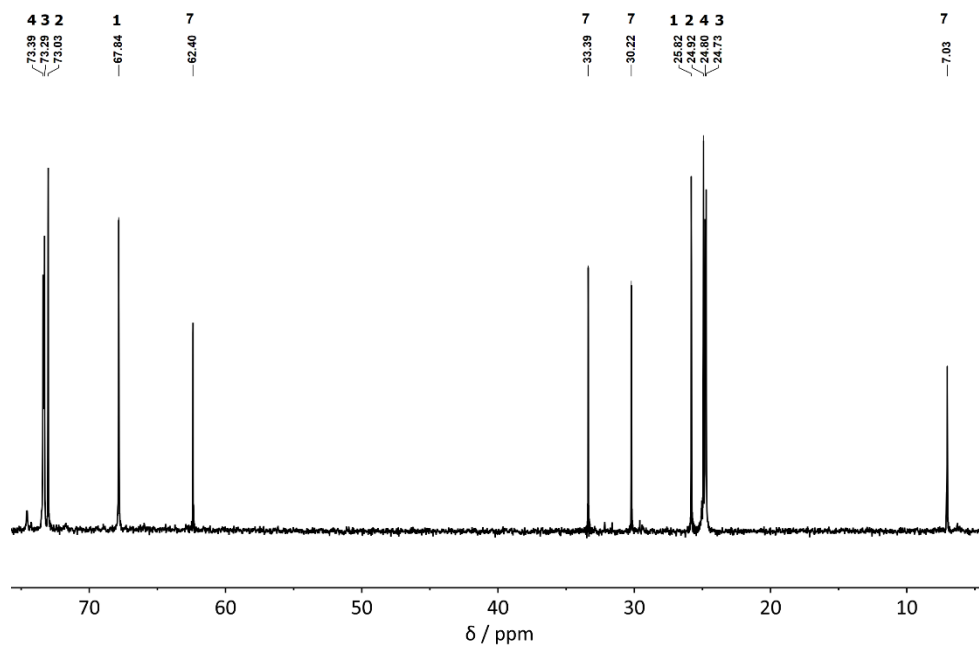

Figure 57:  $^{13}\text{C}\{^1\text{H}\}$  NMR spectrum of Mixture of  $[\text{BeI}_2(\text{thf})_2]$  (**2c**),  $[\text{BeI}(\text{thf})_3]^+$  (**4**),  $[\text{Be}(\text{thf})_4]^{2+}$  (**5**), and  $[\text{Be}(\mu_2\text{-O}(\text{CH}_2)_4\text{I})(\text{thf})_2]$  (**6**) in  $\text{C}_6\text{D}_6$  at  $T = 300$  K. An assignment of **2c**, **4** and **5** is not possible, but a discrimination of signals of different species is therefore, these sets of signals are marked with the integers 1 to 4. Signals corresponding to **6** are marked with the integer 7.

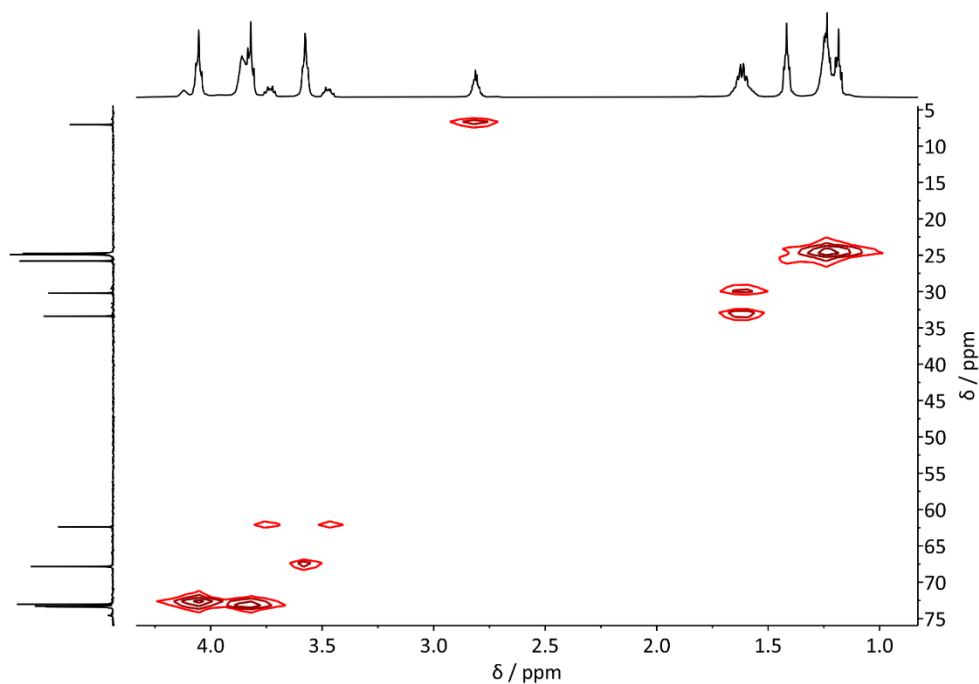

Figure 58:  $^1\text{H}\text{-}^{13}\text{C}$  HMQC NMR spectrum of  $[\text{BeI}_2(\text{thf})_2]$  (**2c**) in  $\text{C}_6\text{D}_6$  at  $T = 300$  K.

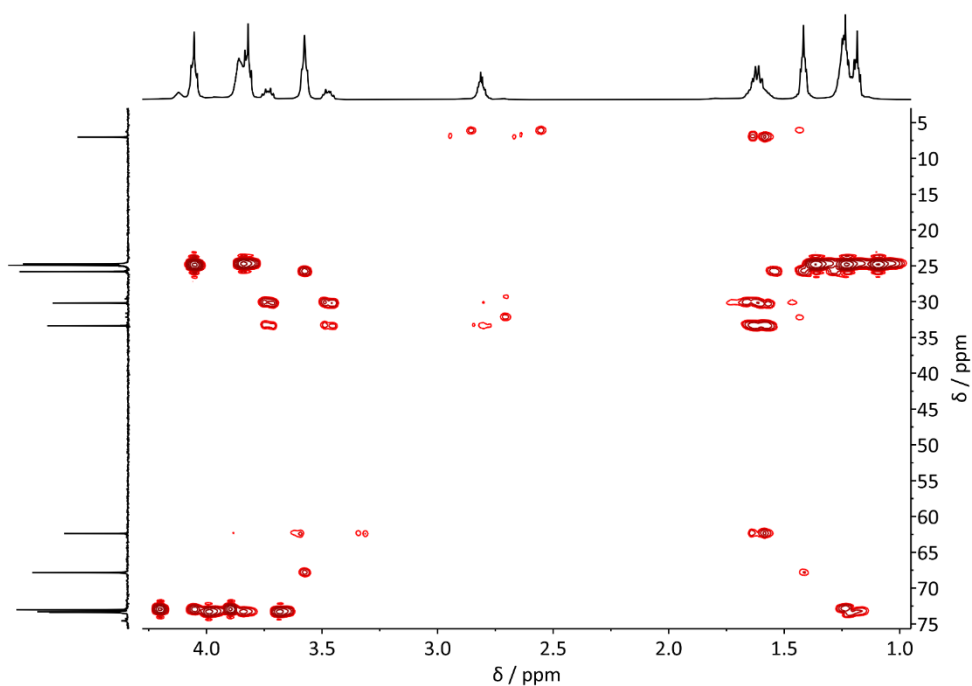

Figure 59:  $^1\text{H}$ - $^{13}\text{C}$  HMBC NMR spectrum of  $[\text{BeI}_2(\text{thf})_2]$  (**2c**) in  $\text{C}_6\text{D}_6$  at  $T = 300\text{ K}$ .

### 1.6.3 Solvent – $\text{CDCl}_3$

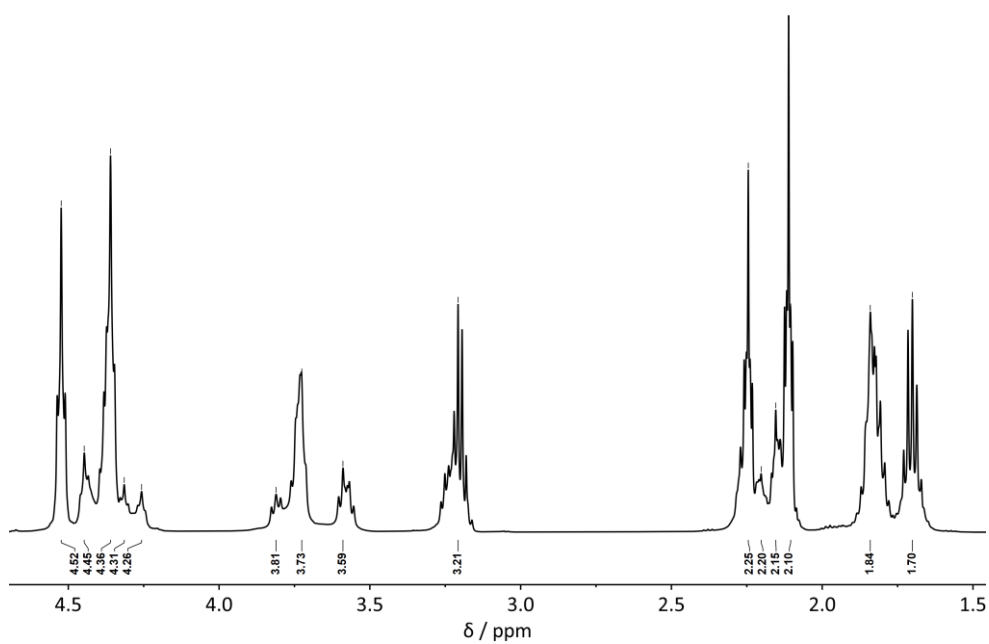

Figure 60:  $^1\text{H}$  NMR spectrum of  $[\text{BeI}_2(\text{thf})_2]$  (**2c**) in  $\text{CDCl}_3$  at  $T = 300\text{ K}$ . Centers of multiplets are marked with the respective chemical shift below the resonance for clarity.

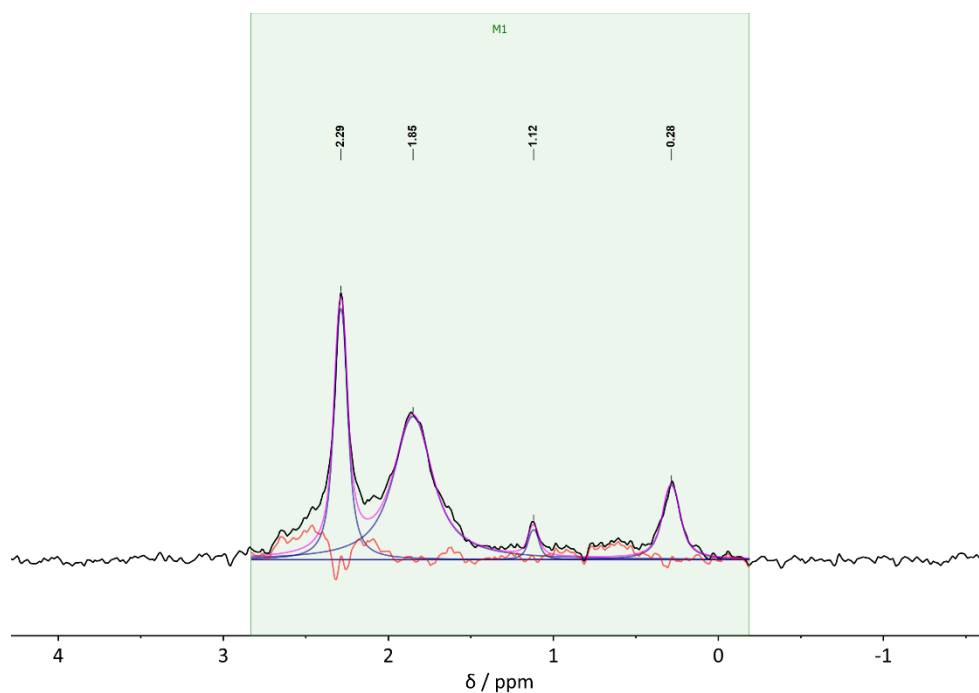

Figure 61:  $^9\text{Be}$  NMR spectrum of  $[\text{BeI}_2(\text{thf})_2]$  (**2c**) in  $\text{CDCl}_3$  at  $T = 300$  K. Summed line fitting profiles (purple), single line fitting profiles (blue) and differential plot of calculated *versus* observed line (red) profiles are marked.

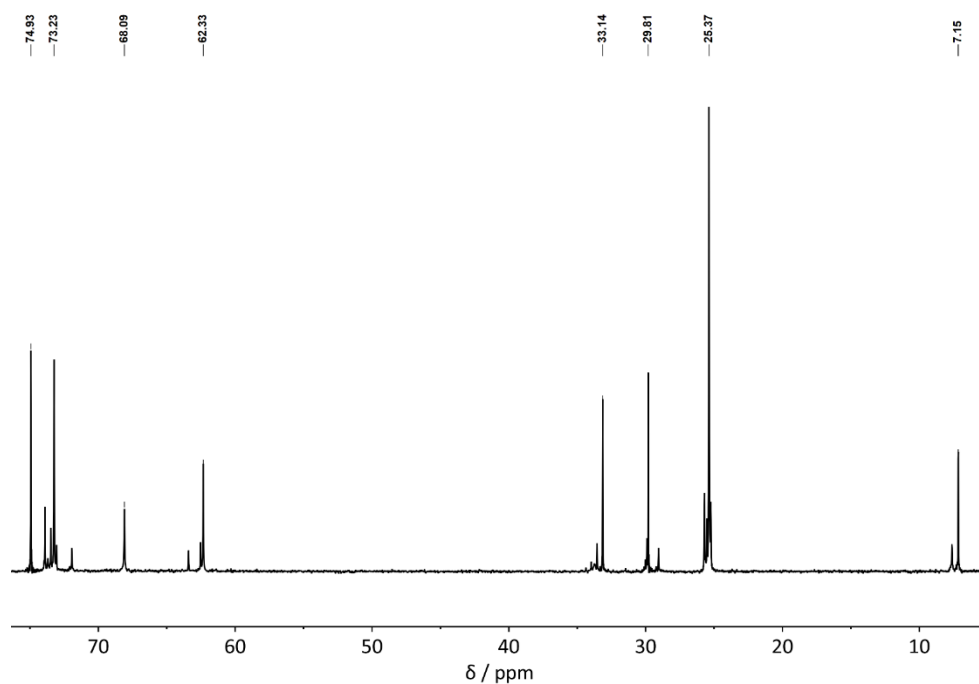

Figure 62:  $^{13}\text{C}\{^1\text{H}\}$  NMR spectrum of  $[\text{BeI}_2(\text{thf})_2]$  (**2c**) in  $\text{CDCl}_3$  at  $T = 300$  K. Only major signals are marked for clarity.



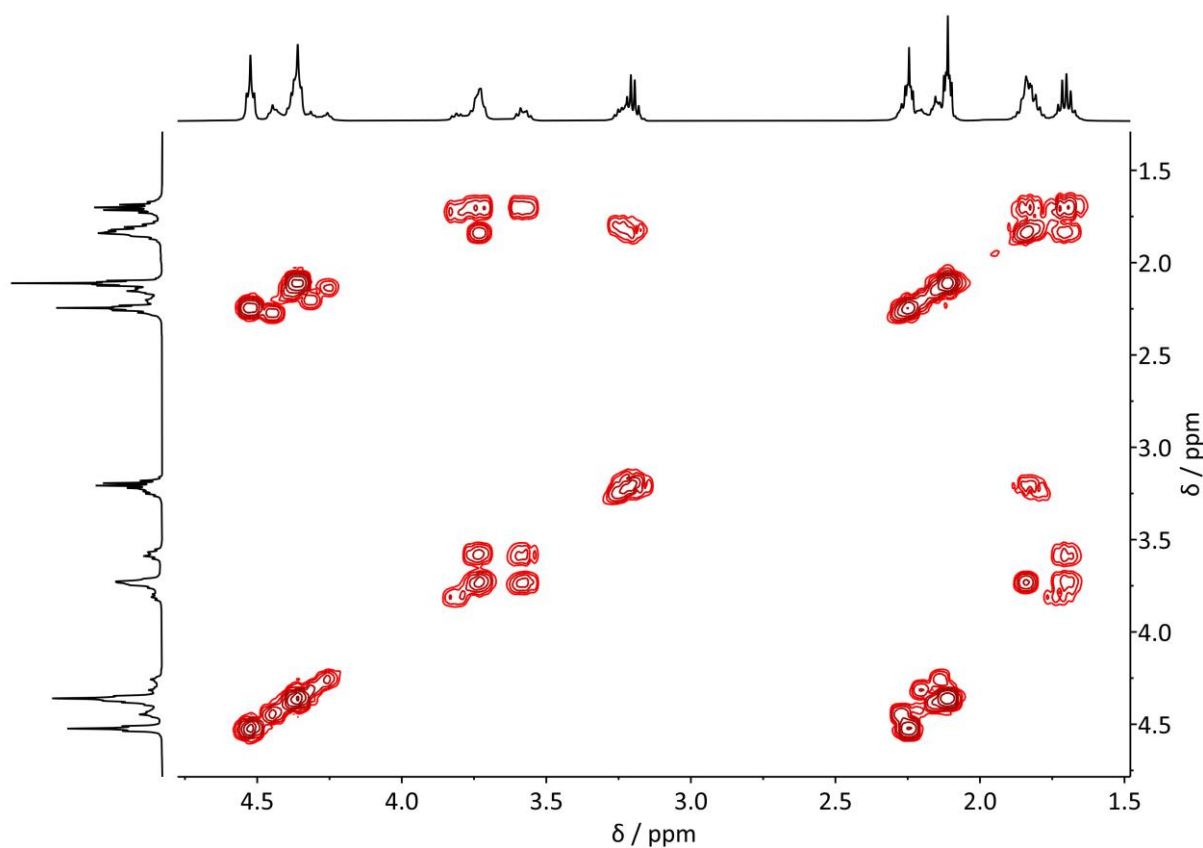

Figure 63:  $^1\text{H}$ - $^1\text{H}$  COSY NMR spectrum of  $[\text{BeI}_2(\text{thf})_2]$  (**2c**) in  $\text{CDCl}_3$  at  $T = 300$  K.

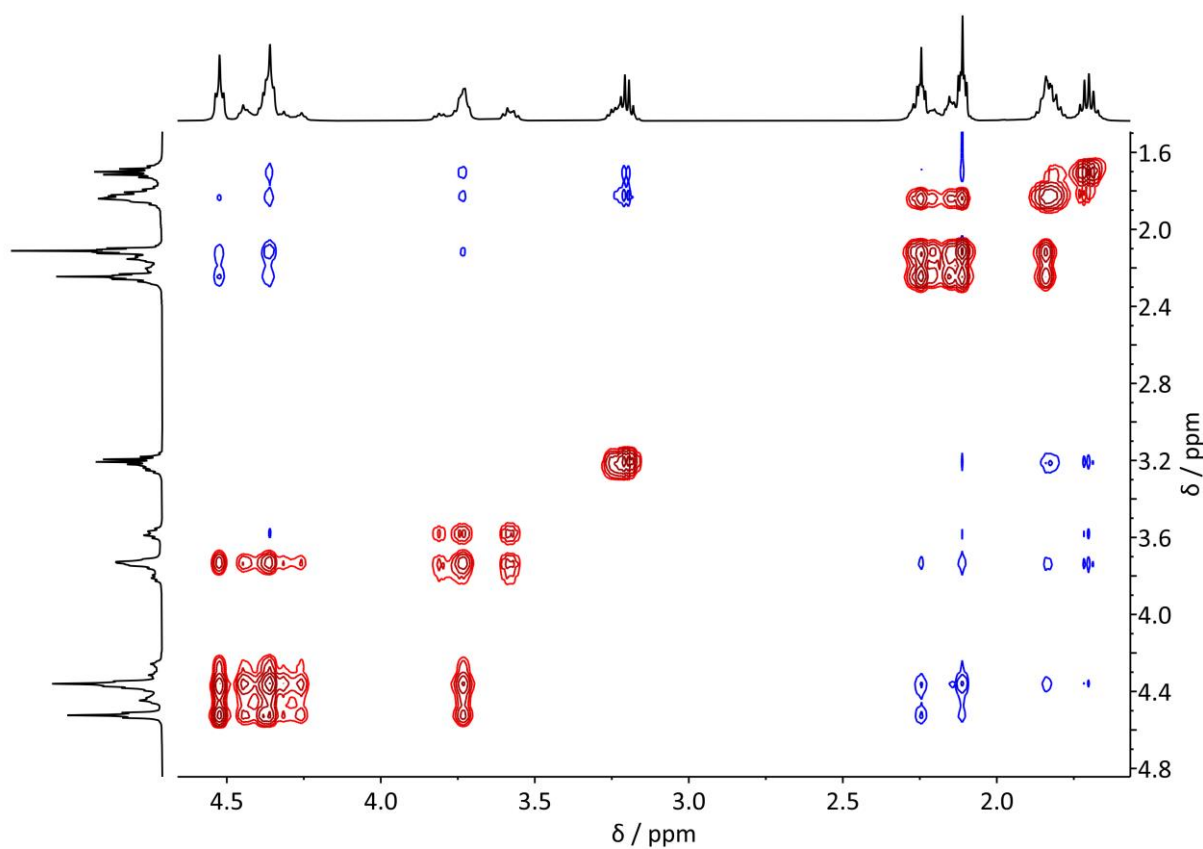

Figure 64:  $^1\text{H}$ - $^1\text{H}$  EXSY NMR spectrum of  $[\text{BeI}_2(\text{thf})_2]$  (**2c**) in  $\text{CDCl}_3$  at  $T = 300$  K. Red signals are positive and blue signals are negative phase.

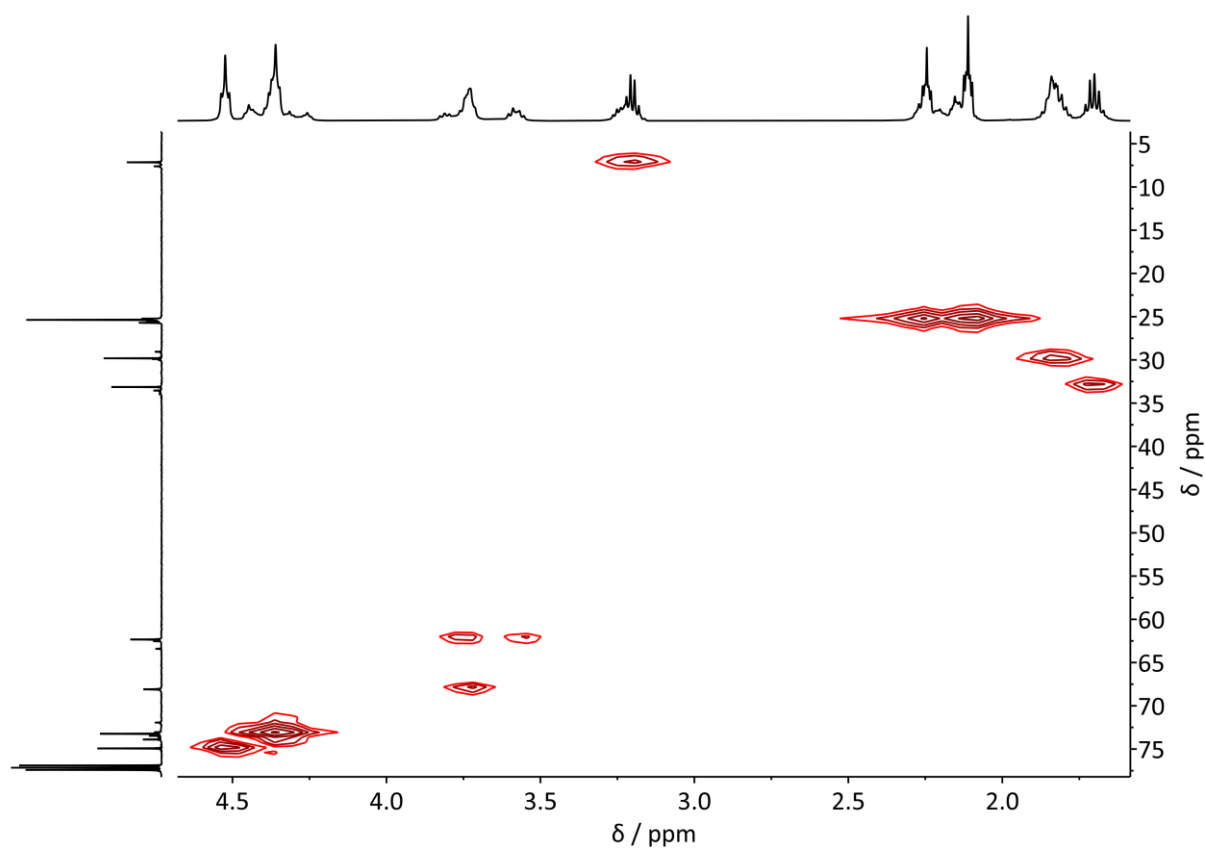

Figure 65:  $^1\text{H}$ - $^{13}\text{C}$  HMQC NMR spectrum of  $[\text{BeI}_2(\text{thf})_2]$  (**2c**) in  $\text{CDCl}_3$  at  $T = 300$  K.

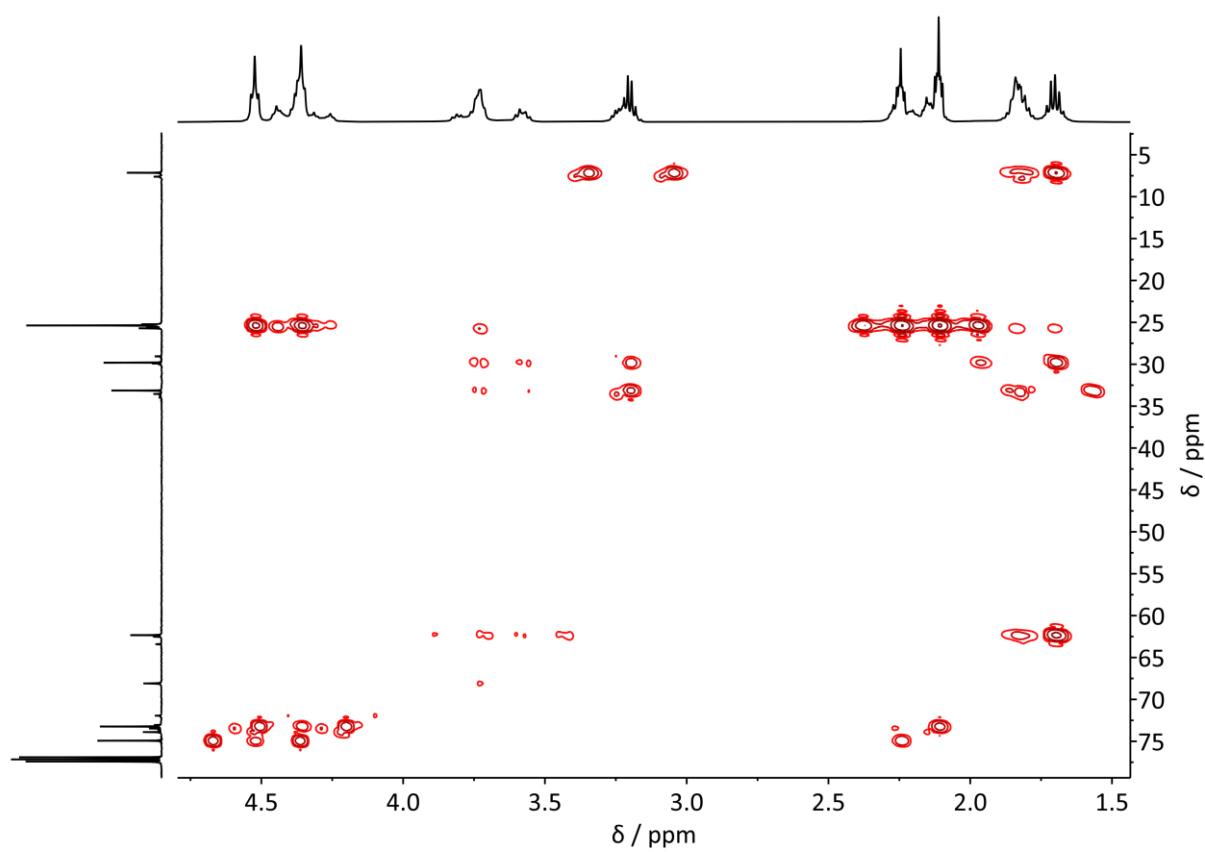

Figure 66:  $^1\text{H}$ - $^{13}\text{C}$  HMBC NMR spectrum of  $[\text{BeI}_2(\text{thf})_2]$  (**2c**) in  $\text{CDCl}_3$  at  $T = 300$  K.

## 1.7 $[\text{BeCl}_2(\text{OEt}_2)]_2$ (**3a**):

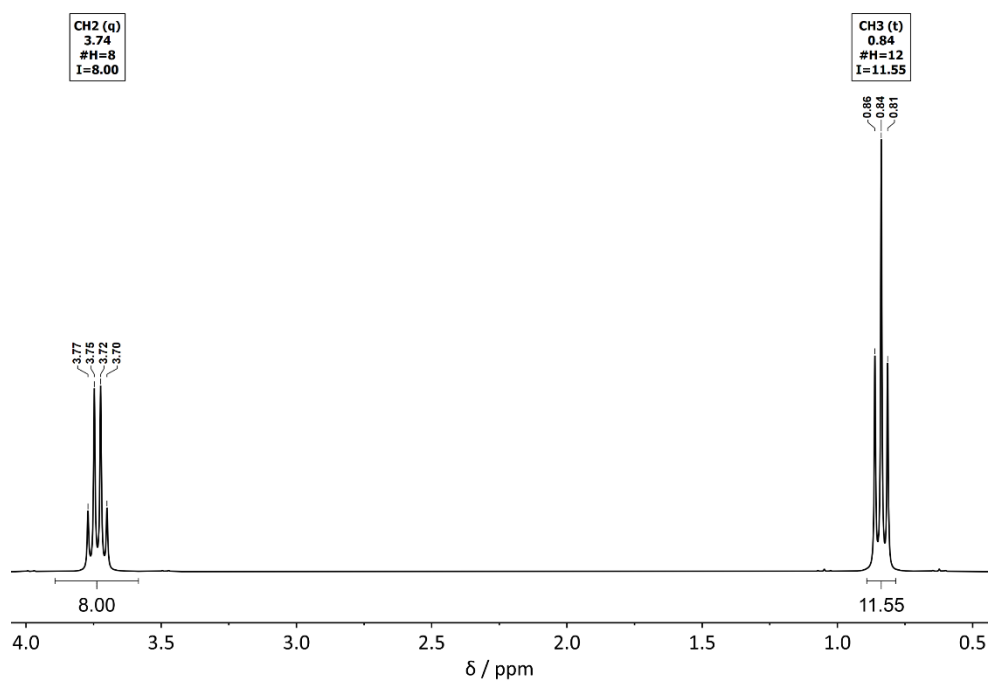

Figure 67:  $^1\text{H}$  NMR spectrum of  $[\text{BeCl}_2(\text{OEt}_2)]_2$  (**3a**) in  $\text{C}_6\text{D}_6$  at  $T = 300$  K.

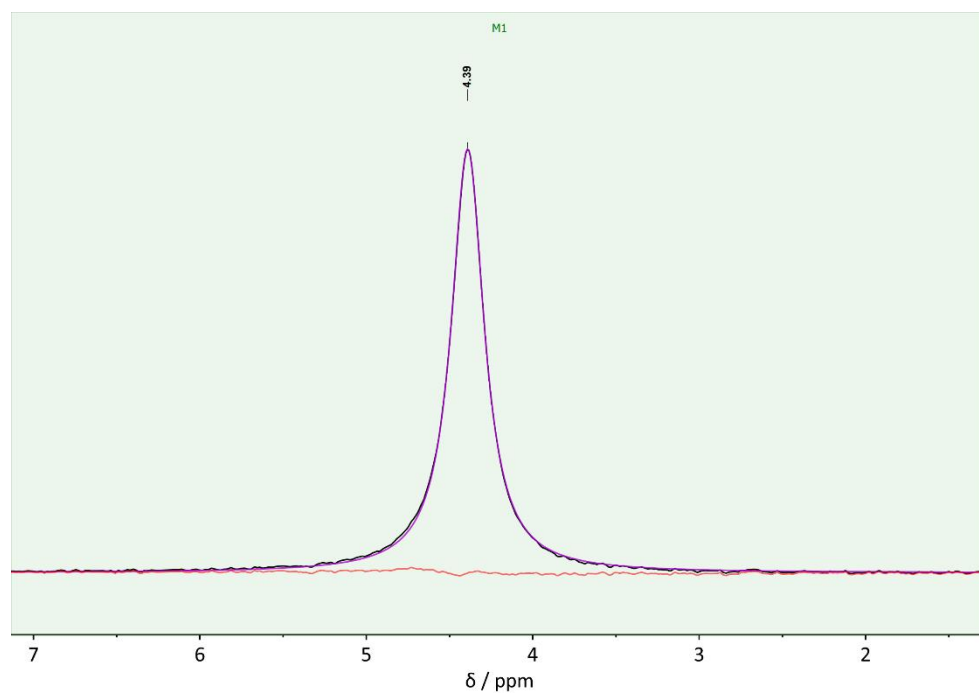

Figure 68:  $^9\text{Be}$  NMR spectrum of  $[\text{BeCl}_2(\text{OEt}_2)]_2$  (**3a**) in  $\text{C}_6\text{D}_6$  at  $T = 300$  K.

## 1.8 $[\text{BeBr}_2(\text{OEt}_2)]_2$ (**3b**):

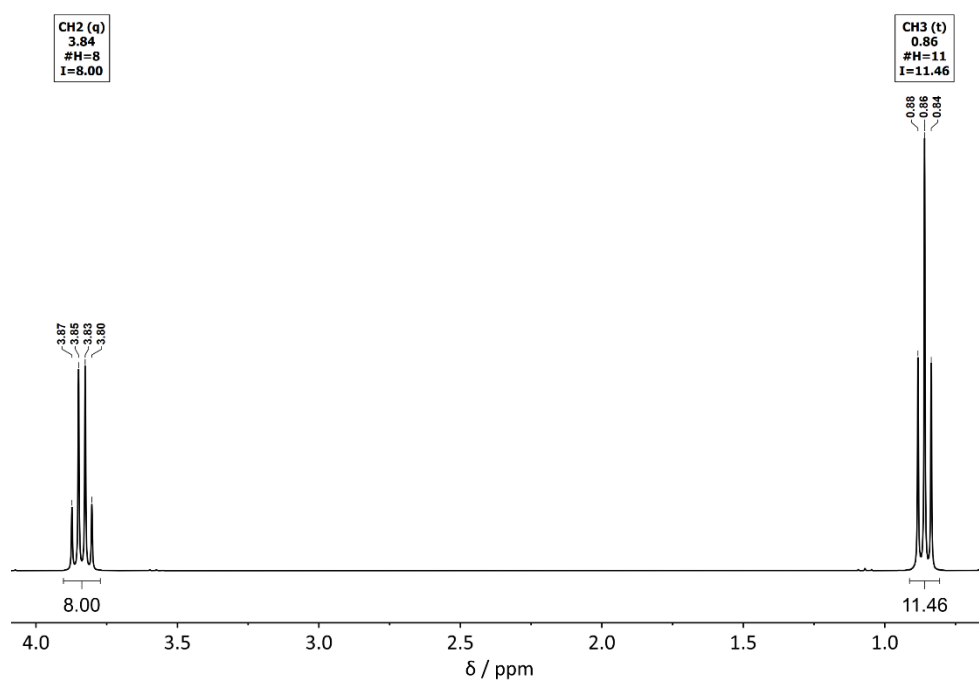

Figure 69:  $^1\text{H}$  NMR spectrum of  $[\text{BeBr}_2(\text{OEt}_2)]_2$  (**3b**) in  $\text{C}_6\text{D}_6$  at  $T = 300$  K.

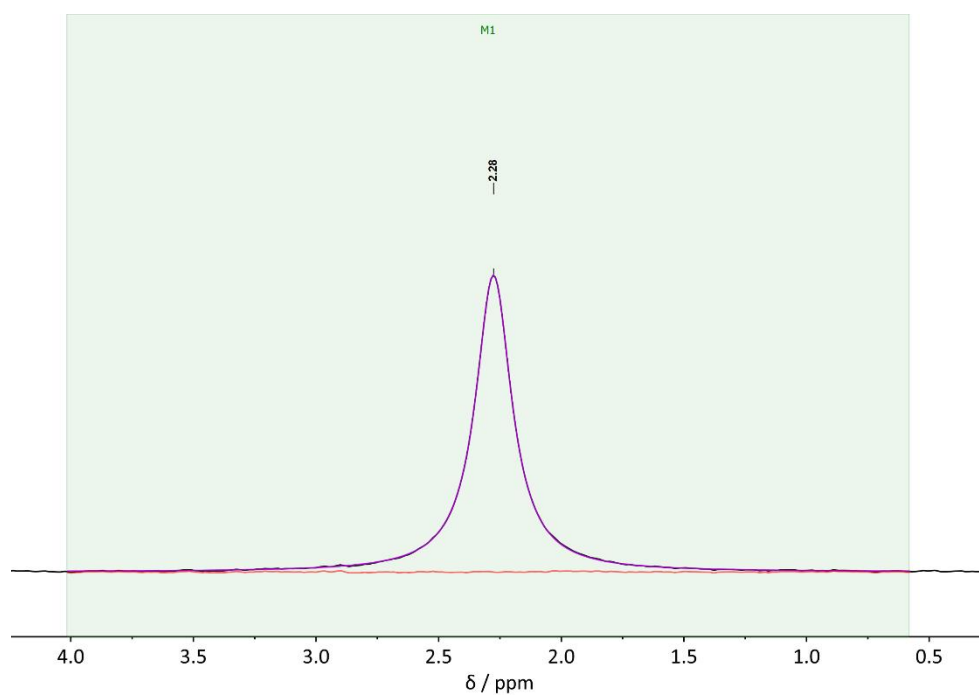

Figure 70:  $^9\text{Be}$  NMR spectrum of  $[\text{BeBr}_2(\text{OEt}_2)]_2$  (**3b**) in  $\text{C}_6\text{D}_6$  at  $T = 300$  K.

## 1.9 $[\text{BeI}_2(\text{OEt}_2)]_2$ (**3c**):

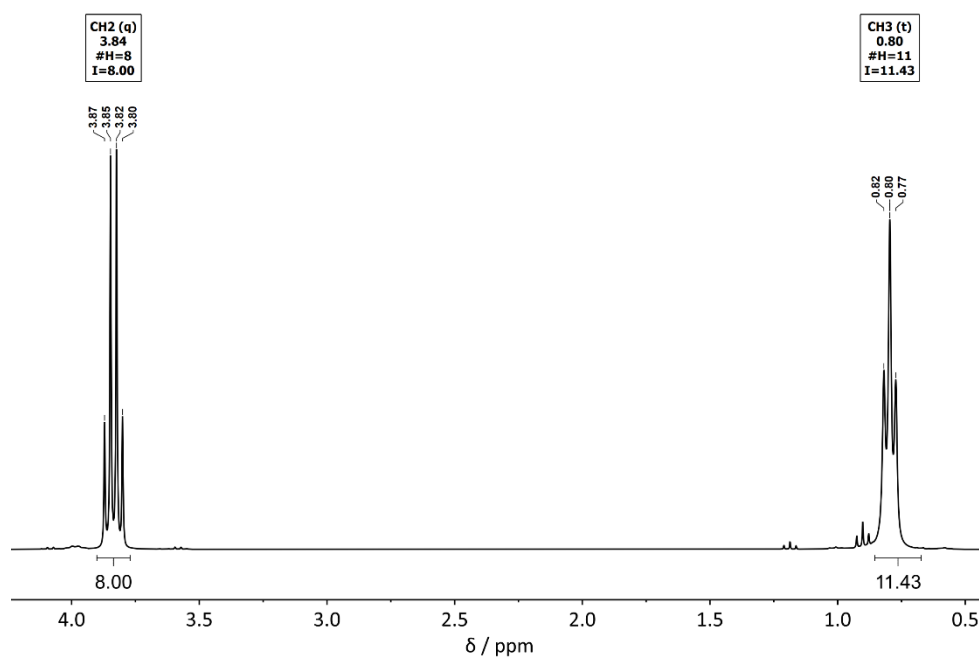

Figure 71:  $^1\text{H}$  NMR spectrum of  $[\text{BeI}_2(\text{OEt}_2)]_2$  (**3c**) in  $\text{C}_6\text{D}_6$  at  $T = 300$  K.

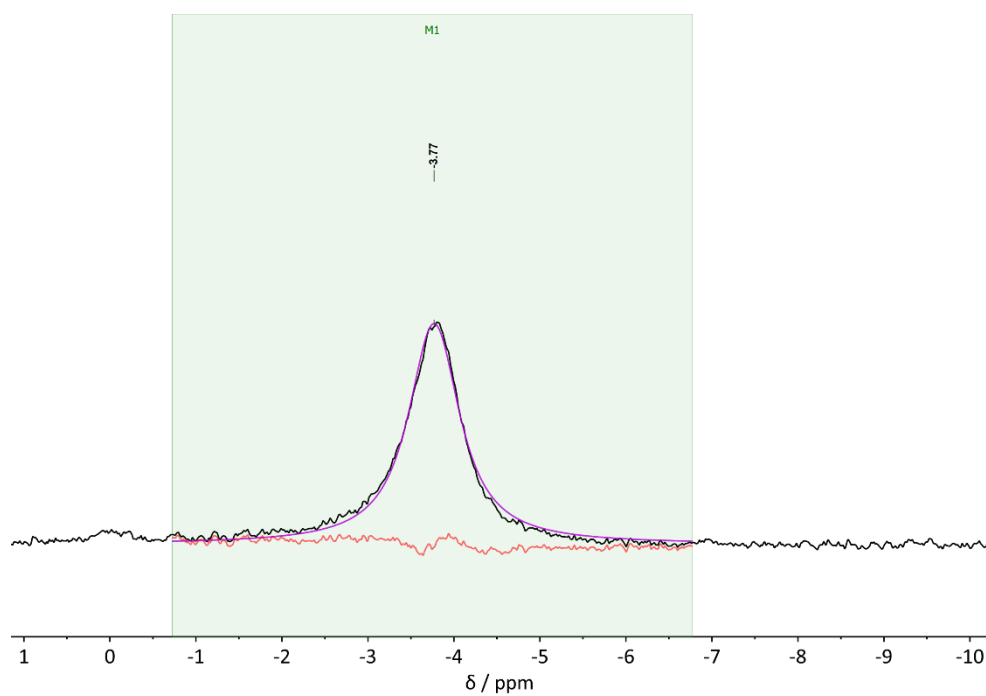

Figure 72:  $^9\text{Be}$  NMR spectrum of  $[\text{BeI}_2(\text{OEt}_2)]_2$  (**3c**) in  $\text{C}_6\text{D}_6$  at  $T = 300$  K.

## 2 Vibrational Spectroscopic Data

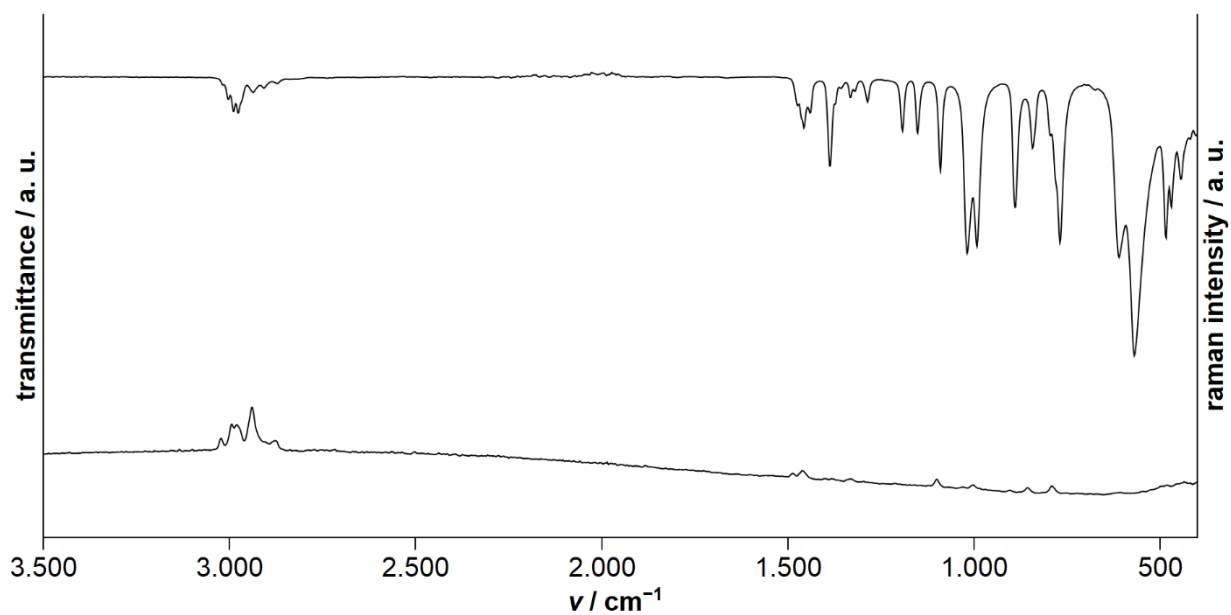

**Figure 73:** IR (top) and Raman (bottom) spectrum of  $[\text{BeBr}_2(\text{OEt}_2)_2]$  (**1b**).

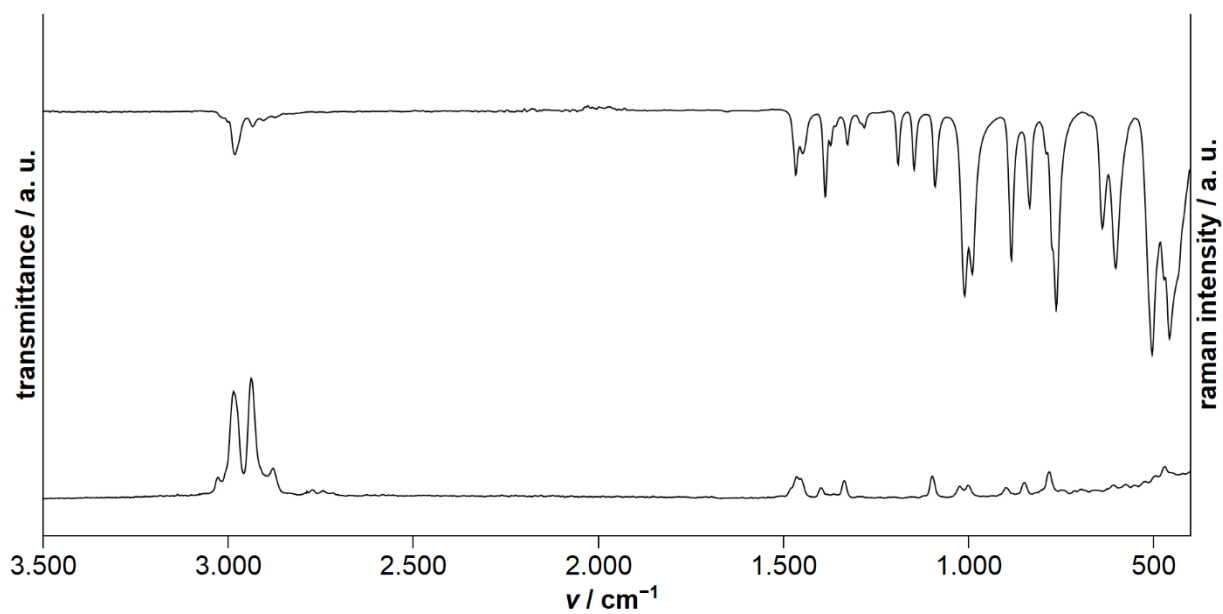

**Figure 74:** IR (top) and Raman (bottom) spectrum of  $[\text{BeI}_2(\text{OEt}_2)_2]$  (**1c**).

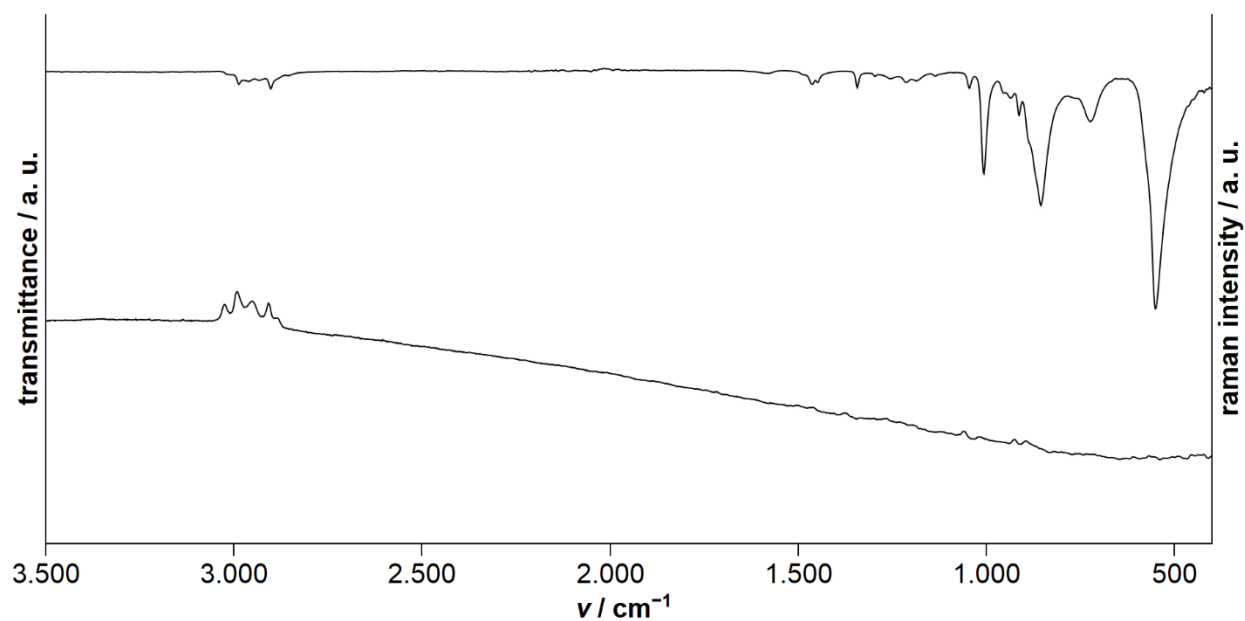

**Figure 75:** IR (top) and Raman (bottom) spectrum of  $[\text{BeBr}_2(\text{thf})_2]$  (**2b**).

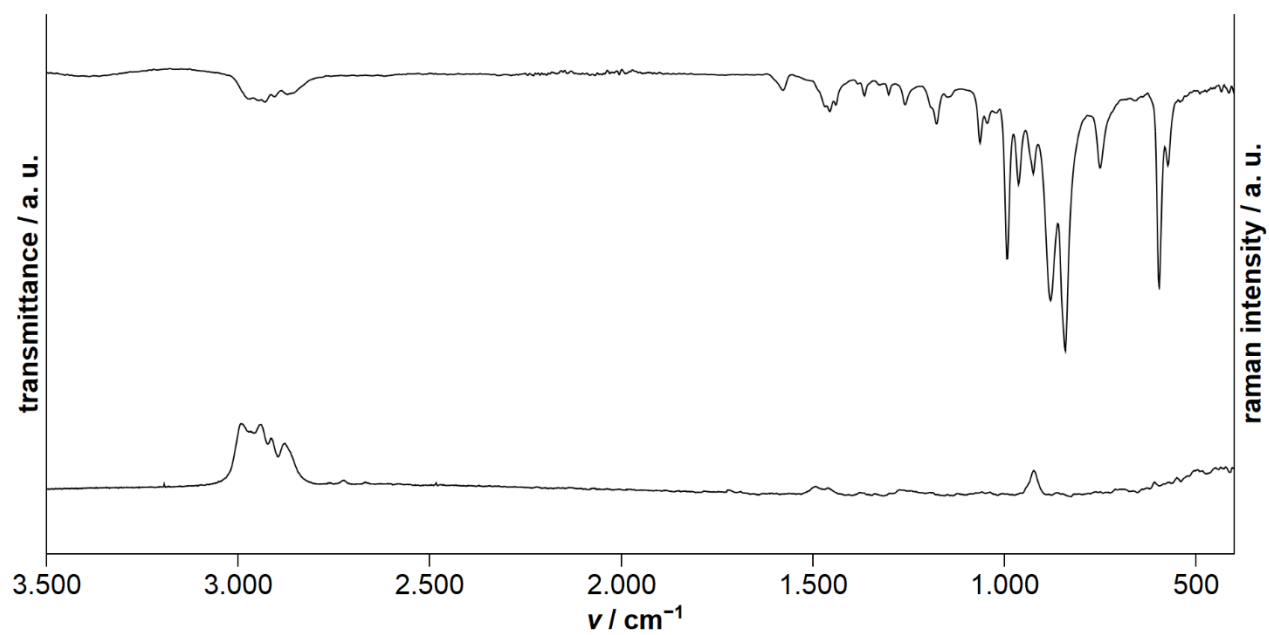

**Figure 76:** IR (top) and Raman (bottom) spectrum of  $[\text{BeI}_2(\text{thf})_2]$  (**2c**).
